# Supplementary material for: Amplification of the Mutation-Carrying BRCA2 Allele Promotes RAD51 Loading and PARP Inhibitor Resistance in the Absence of Reversion Mutations
Source: Oxford University Press journal article supplement (doi:10.1158/1535-7163.mct-17-0256), 2019-10-01
Supplement: 15357163mct170256-sup-180805_3_supp_5774049_pxs0wn.xlsx [file 15357163mct170256-sup-180805_3_supp_5774049_pxs0wn.xlsx]

## Sheet: Sheet1
BRCA2 immunoprecipitation (Tresholding: IgG Peptide Count </=10, IgG<BRCA2, <10% CRAPome)									Loading Control: Non-specific protein pulldown
		Peptide Counts									Peptide Counts
Protein	Molecular Weight	Resistant IgG	Resistant BRCA2	Parental IgG	Parental BRCA2	CRAPome (% time detected in 441 proteomic experiments)	Log2 FC (Res/Sen)		Protein	Molecular Weight	Resistant IgG	Resistant BRCA2	Parental IgG	Parental BRCA2	CRAPome (% time detected in 441 proteomic experiments)	Log2 FC (Res/Sen)
MLLT10	113 kDa	2	22	2	2	0	3.45943		TUBB4B	50 kDa	64	58	34	44	95	0.119975
DOT1L	185 kDa	0	63	0	10	0.0340633	2.65535		TUBA1B	50 kDa	53	44	31	32	95	0.138303
BRCA2	384 kDa	0	138	0	23	0.0291971	2.58496		HSPA1A	70 kDa	43	41	24	26	96	0.197811
BLM	159 kDa	0	34	0	14	0.0510949	1.28011		HSPA8	71 kDa	93	87	77	92	96	-0.0242686
CDK5RAP2	215 kDa	0	34	0	20	0.0194647	0.765535
PFKFB3	60 kDa	0	28	0	17	0.0291971	0.719892
PHF3	229 kDa	0	42	0	26	0.10219	0.691878
MAPK8IP3	147 kDa	0	22	0	18	0.0121655	0.289507
CCP110	113 kDa	0	65	0	62	0.00973236	0.0681715
RFX7	147 kDa	0	59	0	57	0.00243309	0.049753
SEC23A	86 kDa	8	15	9	15	0.0778589	0
CEP97	97 kDa	0	167	0	169	0.00243309	-0.0171751
C2CD3	260 kDa	0	68	0	83	0.00243309	-0.287577
KIAA0753	109 kDa	0	44	0	54	0.00243309	-0.295456
ASXL2	154 kDa	0	39	0	48	0.00486618	-0.29956
CEP131	122 kDa	6	139	3	174	0	-0.324002
NEDD1	72 kDa	0	84	0	107	0.0194647	-0.34915
MIB1	110 kDa	8	142	4	184	0.0194647	-0.373815
FYCO1	167 kDa	0	25	0	33	0.00486618	-0.400538
OFD1	117 kDa	0	67	0	89	0.0316302	-0.409644
GIT1	84 kDa	0	17	0	23	0.0218978	-0.436099
SPTY2D1	76 kDa	7	11	10	15	0.0145985	-0.447459
EML3	95 kDa	0	53	0	73	0	-0.461904
UTP14A	88 kDa	0	51	4	83	0.0827251	-0.702614
PIBF1	90 kDa	0	57	0	93	0.00729927	-0.706269
PPFIA1	136 kDa	0	19	0	33	0.0145985	-0.796467
CEP72	72 kDa	0	23	0	47	0.00973236	-1.03103
WDR90	187 kDa	0	41	0	87	0.00243309	-1.08539
CCDC61	57 kDa	0	16	0	40	0	-1.32193
TTLL5	144 kDa	0	18	0	46	0.00486618	-1.35364
KDM1B	92 kDa	0	19	0	49	0.00243309	-1.36678
CEP95	95 kDa	0	23	0	60	0	-1.38333
CEACAM5	77 kDa	5	7	10	19	0	-1.44057
NAB1	54 kDa	0	41	0	117	0	-1.51281
HERC2	527 kDa	2	25	0	86	0.0194647	-1.78241
NPHP4	158 kDa	0	10	0	39	0	-1.96347
MVK	42 kDa	0	4	0	40	0	-3.32193
	Tresholding: IgG Peptide Count </=10, IgG<BRCA2, <10% CRAPome
END OF FILE
