# Supplementary material for: Amplification of the Mutation-Carrying BRCA2 Allele Promotes RAD51 Loading and PARP Inhibitor Resistance in the Absence of Reversion Mutations
Source: Oxford University Press journal article supplement (doi:10.1158/1535-7163.mct-17-0256), 2019-10-01
Supplement: 15357163mct170256-sup-180805_3_supp_5774050_pxs0wn.xlsx [file 15357163mct170256-sup-180805_3_supp_5774050_pxs0wn.xlsx]

## Sheet: GENES
Table S2, Park and Yamamoto et al 2019							% Reads				p-value
Gene Symbol	SNP Chrosome	SNP Location	Strand	Known SNP	REF	SNP	Resistant	Parental	EFFECT	AA	Resistant	Parental	pv.DIFF	Resistant REF Reads (N)	Resistant SNP Reads (n)	Capan1 REF Reads (N)	Capan1 SNP Reads (n)
SEP11	chr17	39089568	+	rs8068800	A	G	0	1	INTRON		1	7.2544e-12	1.12609e-06	7	0	0	20
ABHD2	chr17	39078939	+	rs2269861	A	G	0	1	INTRON		1	4.7526e-13	2.65435e-06	6	0	0	22
ABHD2	chr7	29686834	-	rs1728637	G	A	0	1	INTRON		1	4.7526e-13	0.000434783	3	0	0	22
ABHD2	chr2	202275922	-	.	C	T	0	0.9	EXON		1	1.6758e-09	0.000395257	5	0	2	18
ABHD2	chr5	56148741	-	rs252920	C	A	0	1	INTRON		1	1.3074e-16	4.21344e-06	5	0	0	28
ABHD2	chr16	74340431	-	rs1195630	C	A	0	1	INTRON		1	1.2146e-13	0.000384615	3	0	0	23
ABHD2	chr2	207275319	-	.	A	G	0	1	EXON		1	3.101e-14	3.8029e-07	7	0	0	24
ABHD2	chr2	207275271	-	.	T	C	0	0.973684	EXON		1	5.6582e-21	6.23313e-06	5	0	1	37
ABHD2	chr3	6222426	+	rs1394157	C	T	0	1	INTRON		1	1.3074e-16	0.000222469	3	0	0	28
ABHD2	chr3	6075509	+	rs146153818	T	C	0	1	INTRON		1	7.2544e-12	9.41088e-05	4	0	0	20
ABHD2	chr3	6039627	+	rs77805376	G	A	0	1	INTRON		1	1.3074e-16	0.000222469	3	0	0	28
ABHD2	chr2	78640076	-	rs2018108	A	G	0	0.8	EXON		1	1.1273e-09	0.000235304	7	0	5	20
ABHD2	chr7	46039487	+	.	T	C	0	1	INTRON		1	7.2544e-12	4.34348e-06	6	0	0	20
ABHD2	chr2	9630016	-	rs1130094	T	C	0	0.505495	UTR_3_PRIME		1	6.249e-18	3.22842e-10	41	0	45	46
ABHD2	chr2	9629367	-	rs13008101	T	G	0	0.666667	UTR_3_PRIME		1	7.1675e-09	0.00021796	10	0	10	20
ABHD2	chr6	147124907	+	.	A	G	0	1	INTRON		1	7.2544e-12	4.34348e-06	6	0	0	20
ABHD2	chr6	147124909	+	.	T	C	0	1	INTRON		1	7.2544e-12	4.34348e-06	6	0	0	20
ABHD2	chr4	88058472	+	rs342461	A	G	0	1	UTR_3_PRIME		1	7.2544e-12	1.88218e-05	5	0	0	20
ABHD2	chr13	42894395	+	rs1562707	G	A	0	1	UTR_3_PRIME		1	2.0165e-15	5.88543e-06	5	0	0	26
ABHD2	chr13	42895166	+	rs1014659	C	T	0	1	UTR_3_PRIME		1	4.7526e-13	6.68896e-05	4	0	0	22
ABHD2	chr13	111533338	-	rs6492324	A	G	0	1	INTRON		1	5.4567e-19	6.50155e-08	7	0	0	32
ABHD2	chr13	111535439	-	rs67008969	T	C	0	1	INTRON		1	3.5146e-20	2.60527e-07	6	0	0	34
AC004231.2	chr3	15863426	-	rs1345161	A	G	0	1	INTRON		1	1.2146e-13	4.91207e-07	7	0	0	23
AC004231.2	chr1	168215575	-	rs2205697	G	A	0	0.909091	EXON		1	1.3117e-10	2.30654e-05	7	0	2	20
AC005062.2	chr1	179416913	+	.	T	C	0	1	INTRON		1	7.2544e-12	1.12609e-06	7	0	0	20
AC005062.2	chr11	111172911	-	rs6589219	G	C	0	1	INTRON		1	4.7526e-13	1.2387e-05	5	0	0	22
AC007255.7	chr11	111172403	-	rs10789823	T	C	0	1	INTRON		1	5.1363e-16	3.17813e-05	4	0	0	27
AC007256.5	chr11	111173290	-	rs6589220	C	T	0	1	INTRON		1	1.2146e-13	5.69801e-05	4	0	0	23
AC008937.2	chr11	111172911	+	rs6589219	G	C	0	1	INTRON		1	4.7526e-13	1.2387e-05	5	0	0	22
AC009120.6	chr11	111172403	+	rs10789823	T	C	0	1	INTRON		1	5.1363e-16	3.17813e-05	4	0	0	27
AC013472.4	chr11	111173290	+	rs6589220	C	T	0	1	INTRON		1	1.2146e-13	5.69801e-05	4	0	0	23
AC017081.2	chr7	7227427	+	rs4263662	C	T	0	1	INTRON		1	7.2544e-12	0.000564653	3	0	0	20
AC017081.2	chr7	134849280	-	rs292501	T	A	0	1	INTRON		1	1.2146e-13	2.10517e-06	6	0	0	23
AC019129.2	chr7	89912301	+	rs1029365	G	A	0	1	NON_SYNONYMOUS_CODING	V->M	1	5.9562e-25	6.51916e-07	5	0	0	42
AC026167.1	chr7	89912301	+	rs1029365	G	A	0	1	EXON		1	5.9562e-25	6.51916e-07	5	0	0	42
AC027119.1	chr7	89912301	+	rs1029365	G	A	0	1	UTR_3_PRIME		1	5.9562e-25	6.51916e-07	5	0	0	42
AC027119.1	chr3	191089680	+	rs1013667	A	G	0	0.761905	INTRON		1	1.2221e-07	0.000668896	7	0	5	16
AC064872.1	chr3	107789504	-	rs2045197	G	A	0	1	INTRON		1	7.2544e-12	1.88218e-05	5	0	0	20
AC073115.7	chr1	227250459	-	rs1929865	A	G	0	1	INTRON		1	2.0165e-15	3.64897e-05	4	0	0	26
AC073343.13	chr3	88181016	-	rs4501136	G	A	0	1	INTRON		1	4.7526e-13	6.40705e-07	7	0	0	22
AC091492.2	chr3	88188420	-	rs9813894	G	A	0	1	INTRON		1	5.1363e-16	9.02879e-07	6	0	0	27
AC091492.2	chr7	29552463	+	rs1420145	C	G	0	1	EXON		1	1.3074e-16	1.48709e-07	7	0	0	28
AC091492.2	chr7	29552463	+	rs1420145	C	G	0	1	UTR_3_PRIME		1	1.3074e-16	1.48709e-07	7	0	0	28
AC091492.2	chr1	47840009	+	rs2622912	C	A	0	1	INTRON		1	7.2544e-12	9.41088e-05	4	0	0	20
ACAA1	chr22	30422107	-	rs41171	C	G	0	1	INTRON		1	1.2146e-13	1.0175e-05	5	0	0	23
ACAA1	chr18	19997355	-	.	G	T	0	1	SYNONYMOUS_CODING	S->S	1	1.2146e-13	4.91207e-07	7	0	0	23
ACAA1	chr5	36686404	-	rs2229894	G	A	0	1	INTRON		1	2.1486e-18	4.30147e-07	6	0	0	31
ACTB	chr9	90139569	+	rs888330	T	G	0	0.846154	INTRON		1	5.5261e-11	0.000741565	5	0	4	22
ACTB	chr10	124334614	+	rs3013240	C	T	0	0.979592	INTRON		1	1.9625e-27	2.41465e-07	6	0	1	48
ACTB	chr8	25269277	+	rs10866842	G	T	0	0.952381	EXON		1	4.0873e-11	2.36478e-05	6	0	1	20
ADAM17	chr8	25269277	+	rs10866842	G	T	0	0.952381	UTR_3_PRIME		1	4.0873e-11	2.36478e-05	6	0	1	20
ADAM17	chr12	77449790	-	rs310791	A	G	0	1	NON_SYNONYMOUS_CODING	F->L	1	1.2146e-13	4.91207e-07	7	0	0	23
ADGB	chr12	77449790	-	rs310791	A	G	0	1	EXON		1	1.2146e-13	4.91207e-07	7	0	0	23
ADGB	chr5	106887175	-	rs163727	C	G	0	1	INTRON		1	7.2544e-12	1.88218e-05	5	0	0	20
ADI1	chr8	117732100	-	rs10156225	G	A	0	1	INTRON		1	1.8578e-12	0.000494071	3	0	0	21
AFF1	chr7	37991129	+	rs2722279	C	A	0	1	UTR_3_PRIME		1	4.1752e-38	7.62684e-09	6	0	0	64
AGR2	chr7	37988589	+	rs2044831	C	T	0	0.977778	SYNONYMOUS_CODING	I->I	1	4.4304e-25	3.88685e-07	6	0	1	44
AGR3	chr7	37988589	+	rs2044831	C	T	0	0.977778	INTRON		1	4.4304e-25	3.88685e-07	6	0	1	44
AGR3	chr1	43309548	+	rs1484324	G	A	0	1	EXON		1	4.7526e-13	6.68896e-05	4	0	0	22
AHR	chr1	43309548	+	rs1484324	G	A	0	1	UTR_3_PRIME		1	4.7526e-13	6.68896e-05	4	0	0	22
AHR	chr12	11852495	+	rs2856320	A	G	0	1	INTRON		1	4.7526e-13	6.68896e-05	4	0	0	22
AHR	chr7	133339603	+	rs2430767	T	C	0	1	INTRON		1	7.9107e-15	7.01725e-06	5	0	0	25
AIMP2	chr6	159236384	-	rs3102967	T	C	0	1	INTRON		1	7.2544e-12	1.88218e-05	5	0	0	20
AKAP11	chr13	99054798	+	rs2306442	G	A	0	1	EXON		1	4.7526e-13	1.2387e-05	5	0	0	22
AKAP11	chr13	99055575	+	rs4772074	A	G	0	1	EXON		1	7.2544e-12	1.88218e-05	5	0	0	20
AKAP2	chr13	99051172	+	rs3783015	C	A	0	1	INTRON		1	2.0165e-15	2.3408e-07	7	0	0	26
AKAP2	chr13	99051418	+	rs4771302	C	T	0	1	INTRON		1	4.7526e-13	2.65435e-06	6	0	0	22
AKAP2	chr13	99054798	+	rs2306442	G	A	0	1	INTRON		1	4.7526e-13	1.2387e-05	5	0	0	22
ANKRD10	chr13	99055575	+	rs4772074	A	G	0	1	INTRON		1	7.2544e-12	1.88218e-05	5	0	0	20
ANKRD10	chr3	171864595	+	rs9821928	G	C	0	0.833333	INTRON		1	6.3493e-10	0.000353669	6	0	4	20
ANKRD28	chr14	75746690	+	rs1046117	C	T	0	1	NON_SYNONYMOUS_CODING	R->C	1	1.8578e-12	8.44566e-07	7	0	0	21
ANKRD36BP1	chr14	75746690	+	rs1046117	C	T	0	1	START_GAINED		1	1.8578e-12	8.44566e-07	7	0	0	21
ANKS6	chr14	75746690	+	rs1046117	C	T	0	1	SYNONYMOUS_CODING	S->S	1	1.8578e-12	8.44566e-07	7	0	0	21
ANKS6	chr3	69230801	-	rs9836305	G	A	0	1	SYNONYMOUS_CODING	H->H	1	7.2544e-12	1.88218e-05	5	0	0	20
ANKS6	chrX	73435386	-	rs174210	C	T	0	1	INTRON		1	7.9107e-15	7.01725e-06	5	0	0	25
ANKS6	chr9	4284658	-	rs10739041	G	C	0	1	INTRON		1	7.2544e-12	1.12609e-06	7	0	0	20
ANXA11	chr12	14408010	+	.	A	T	0	1	EXON		1	1.8578e-12	3.37826e-06	6	0	0	21
ANXA11	chr2	132182266	-	.	G	T	0	1	EXON		1	1.8578e-12	0.000494071	3	0	0	21
ANXA2P1	chr6	46980115	-	rs1226479	G	A	0	0.966667	EXON		1	2.6212e-16	7.77041e-07	7	0	1	29
AP000350.6	chr6	47006642	-	rs1226513	A	G	0	1	INTRON		1	3.101e-14	3.8029e-07	7	0	0	24
AP000350.6	chr6	46980115	-	rs1226479	G	A	0	0.966667	INTRON		1	2.6212e-16	7.77041e-07	7	0	1	29
AP4E1	chr13	95284231	+	rs2226078	A	G	0	1	UTR_3_PRIME		1	3.101e-14	8.4207e-06	5	0	0	24
AP4E1	chr4	71697864	-	rs1477883	T	C	0	1	INTRON		1	7.2544e-12	1.88218e-05	5	0	0	20
AP4E1	chr15	59934012	-	rs12902774	T	C	0	1	INTRON		1	1.8578e-12	0.000494071	3	0	0	21
ARHGAP35	chr7	18243479	+	rs1178315	C	T	0	1	INTRON		1	3.5146e-20	2.60527e-07	6	0	0	34
ATG3	chr7	18243492	+	rs1178314	T	A	0	1	INTRON		1	2.1486e-18	4.30147e-07	6	0	0	31
ATG3	chr6	26125342	+	rs129128	C	T	0	1	INTRON		1	4.7526e-13	6.68896e-05	4	0	0	22
AXDND1	chr14	21717900	-	rs2065093	T	C	0	1	INTRON		1	7.2544e-12	9.41088e-05	4	0	0	20
BRD9	chr16	82081505	+	rs8044837	T	C	0	1	INTRON		1	5.4567e-19	2.29412e-06	5	0	0	32
C11orf1	chr2	9629367	+	rs13008101	T	G	0	0.666667	UTR_3_PRIME		1	7.1675e-09	0.00021796	10	0	10	20
C11orf1	chr2	9630016	+	rs1130094	T	C	0	0.505495	INTRON		1	6.249e-18	3.22842e-10	41	0	45	46
C11orf31	chr2	9629367	+	rs13008101	T	G	0	0.666667	INTRON		1	7.1675e-09	0.00021796	10	0	10	20
C11orf31	chr4	142997384	-	rs1390987	A	G	0	1	INTRON		1	4.7526e-13	6.40705e-07	7	0	0	22
C11orf92	chr4	143121546	-	rs1343812	T	A	0	1	INTRON		1	1.8578e-12	8.44566e-07	7	0	0	21
C11orf92	chr4	142978591	-	rs1511254	T	C	0	1	INTRON		1	7.2544e-12	4.34348e-06	6	0	0	20
C11orf92	chr4	143110610	-	rs3113519	A	G	0	1	INTRON		1	1.2146e-13	5.69801e-05	4	0	0	23
C11orf93	chr4	143046110	-	rs2667083	A	G	0	1	INTRON		1	7.2544e-12	9.41088e-05	4	0	0	20
C11orf93	chr5	39719286	-	.	A	G	0	1	EXON		1	4.7526e-13	6.40705e-07	7	0	0	22
C11orf93	chr3	121529011	-	rs7623901	T	C	0	1	INTRON		1	1.8578e-12	3.37826e-06	6	0	0	21
C14orf37	chr16	54968239	+	rs1133611	A	G	0	1	UTR_3_PRIME		1	1.2146e-13	5.69801e-05	4	0	0	23
C1GALT1	chr7	20383194	+	rs4721901	G	A	0	1	INTRON		1	7.2544e-12	1.88218e-05	5	0	0	20
C2orf61	chr3	49213637	+	rs9586	C	T	0	1	EXON		1	4.7526e-13	6.40705e-07	7	0	0	22
C7orf49	chr3	49213637	+	rs9586	C	T	0	1	UTR_3_PRIME		1	4.7526e-13	6.40705e-07	7	0	0	22
C7orf63	chr13	50273603	-	rs3720	A	G	0	1	UTR_3_PRIME		1	5.1363e-16	1.85887e-07	7	0	0	27
C7orf63	chr7	91850889	-	rs4369	C	T	0	1	INTRON		1	1.2146e-13	4.91207e-07	7	0	0	23
C7orf63	chr17	39089568	-	rs8068800	A	G	0	1	INTRON		1	7.2544e-12	1.12609e-06	7	0	0	20
CALM2	chr3	45466026	+	rs11130060	T	C	0	1	INTRON		1	7.2544e-12	9.41088e-05	4	0	0	20
CALM2	chr9	130914434	+	rs2232629	A	G	0	1	INTRON		1	5.1363e-16	1.85887e-07	7	0	0	27
CCBL2	chr9	130912183	+	rs72756848	C	T	0	0.791667	INTRON		1	3.6826e-09	0.000301189	7	0	5	19
CCDC50	chr17	39958344	-	rs1061843	T	C	0	1	EXON		1	5.4567e-19	3.62229e-07	6	0	0	32
CD47	chr17	39958344	-	rs1061843	T	C	0	1	UTR_3_PRIME		1	5.4567e-19	3.62229e-07	6	0	0	32
CD58	chr6	72093117	-	rs9455451	G	A	0	1	INTRON		1	3.101e-14	1.68414e-06	6	0	0	24
CDC42BPA	chr15	101112342	-	rs1493652	T	C	0	1	EXON		1	1.2146e-13	1.0175e-05	5	0	0	23
CDCA7L	chr15	101112342	-	rs1493652	T	C	0	1	INTRON		1	1.2146e-13	1.0175e-05	5	0	0	23
CDCA7L	chr13	47325150	+	rs4942574	G	A	0	1	UTR_3_PRIME		1	4.7526e-13	1.2387e-05	5	0	0	22
CDCA7L	chr3	66525963	-	rs3845905	T	C	0	1	INTRON		1	7.2544e-12	1.88218e-05	5	0	0	20
CDCA7L	chr3	66454994	-	rs3845892	G	A	0	1	INTRON		1	1.8578e-12	7.90514e-05	4	0	0	21
CGGBP1	chr17	48830549	+	rs8064977	G	A	0	1	UTR_3_PRIME		1	7.2544e-12	1.12609e-06	7	0	0	20
CGGBP1	chr3	65340908	-	rs2061937	C	T	0	0.973684	UTR_3_PRIME		1	5.6582e-21	9.91635e-07	6	0	1	37
CHMP4BP1	chr3	65991386	-	rs58592817	A	G	0	1	INTRON		1	5.9562e-25	1.16414e-08	7	0	0	42
CHN2	chr3	65831092	-	rs17073946	T	C	0	1	INTRON		1	2.1486e-18	7.92377e-08	7	0	0	31
CHN2	chr3	65816203	-	rs17438517	A	G	0	1	INTRON		1	7.9107e-15	7.01725e-06	5	0	0	25
CLPTM1L	chr3	65814779	-	rs12629397	G	T	0	1	INTRON		1	3.101e-14	8.4207e-06	5	0	0	24
CMPK1	chr3	65825637	-	rs7635883	C	G	0	1	INTRON		1	7.2544e-12	9.41088e-05	4	0	0	20
CORO2A	chr3	65967480	-	rs7651988	T	C	0	1	INTRON		1	7.9107e-15	0.00030525	3	0	0	25
COTL1	chr5	56148741	+	rs252920	C	A	0	1	INTRON		1	1.3074e-16	4.21344e-06	5	0	0	28
COTL1	chr3	152103745	+	rs13094115	A	G	0	0.73913	INTRON		1	5.7694e-08	0.000842912	7	0	6	17
CSNK2B	chr13	97931709	+	rs9516888	A	G	0	1	INTRON		1	1.8578e-12	0.000494071	3	0	0	21
CSNK2B	chr1	85484366	-	rs7522239	A	G	0	1	EXON		1	2.1486e-18	7.92377e-08	7	0	0	31
CSTF2T	chr1	85484366	-	rs7522239	A	G	0	1	UTR_3_PRIME		1	2.1486e-18	7.92377e-08	7	0	0	31
CTA-85E5.10	chr3	169213900	-	rs10936582	T	C	0	0.8125	INTRON		1	1.5064e-12	0.000111567	7	0	6	26
CTAGE1	chr3	169169979	-	rs78357734	G	T	0	0.88	INTRON		1	2.5916e-11	0.000114087	6	0	3	22
CTD-2353F22.1	chr1	179416913	-	.	T	C	0	1	EXON		1	7.2544e-12	1.12609e-06	7	0	0	20
CYBA	chr12	16592004	+	rs2417573	A	G	0	1	INTRON		1	1.8578e-12	1.52022e-05	5	0	0	21
DAPK1	chr15	23811592	+	rs2239669	C	T	0	1	SYNONYMOUS_CODING	P->P	1	1.2146e-13	2.10517e-06	6	0	0	23
DCAF13P3	chr15	23811592	+	rs2239669	C	T	0	1	INTRON		1	1.2146e-13	2.10517e-06	6	0	0	23
DCAF13P3	chr15	23813497	+	rs59329234	C	T	0	1	INTRON		1	4.7526e-13	2.65435e-06	6	0	0	22
DCAF13P3	chr12	88177997	-	.	T	C	0	1	EXON		1	4.7526e-13	6.40705e-07	7	0	0	22
DMBT1	chr22	30422107	+	rs41171	C	G	0	1	UTR_3_PRIME		1	1.2146e-13	1.0175e-05	5	0	0	23
DNAAF2	chr3	195515594	-	rs13095016	C	G	0	1	NON_SYNONYMOUS_CODING	E->Q	1	6.1512e-28	4.35588e-08	6	0	0	47
DNAH11	chr3	195511331	-	rs56359992	A	G	0	0.977273	NON_SYNONYMOUS_CODING	S->P	1	1.7144e-24	6.90995e-08	7	0	1	43
DOCK5	chr3	195512004	-	rs148317288	T	G	0	1	NON_SYNONYMOUS_CODING	E->D	1	1.2146e-13	2.10517e-06	6	0	0	23
DOCK5	chr3	195512042	-	rs6805660	T	C	0	1	NON_SYNONYMOUS_CODING	T->A	1	2.2598e-21	1.09421e-05	4	0	0	36
E2F7	chr3	195510217	-	rs145853807	A	G	0	0.9	NON_SYNONYMOUS_CODING	V->A	1	1.6758e-09	0.000121618	6	0	2	18
E2F7	chr3	195515617	-	rs2641776	G	C	0	0.971429	NON_SYNONYMOUS_CODING	T->S	1	3.2089e-19	0.000474158	3	0	1	34
EFHC2	chr3	195515594	-	rs13095016	C	G	0	1	EXON		1	6.1512e-28	4.35588e-08	6	0	0	47
EFNA5	chr3	195511331	-	rs56359992	A	G	0	0.977273	EXON		1	1.7144e-24	6.90995e-08	7	0	1	43
EIF2AK1	chr3	195512004	-	rs148317288	T	G	0	1	EXON		1	1.2146e-13	2.10517e-06	6	0	0	23
EIF3EP1	chr3	195512042	-	rs6805660	T	C	0	1	EXON		1	2.2598e-21	1.09421e-05	4	0	0	36
EIF3H	chr3	195510217	-	rs145853807	A	G	0	0.9	EXON		1	1.6758e-09	0.000121618	6	0	2	18
EPDR1	chr3	195511590	-	rs3103955	A	G	0	0.980392	EXON		1	1.3013e-28	0.000161264	3	0	1	50
EPDR1	chr3	195515617	-	rs2641776	G	C	0	0.971429	EXON		1	3.2089e-19	0.000474158	3	0	1	34
EPDR1	chr3	195511590	-	rs3103955	A	G	0	0.980392	SYNONYMOUS_CODING	T->T	1	1.3013e-28	0.000161264	3	0	1	50
ERCC6L2	chr3	195515594	-	rs13095016	C	G	0	1	INTRON		1	6.1512e-28	4.35588e-08	6	0	0	47
ERCC6L2	chr3	195511331	-	rs56359992	A	G	0	0.977273	INTRON		1	1.7144e-24	6.90995e-08	7	0	1	43
ERCC6L2	chr3	195512004	-	rs148317288	T	G	0	1	INTRON		1	1.2146e-13	2.10517e-06	6	0	0	23
ERCC6L2	chr3	195512042	-	rs6805660	T	C	0	1	INTRON		1	2.2598e-21	1.09421e-05	4	0	0	36
ERMAP	chr3	195510217	-	rs145853807	A	G	0	0.9	INTRON		1	1.6758e-09	0.000121618	6	0	2	18
ERMAP	chr3	195511590	-	rs3103955	A	G	0	0.980392	INTRON		1	1.3013e-28	0.000161264	3	0	1	50
ETV6	chr3	195515617	-	rs2641776	G	C	0	0.971429	INTRON		1	3.2089e-19	0.000474158	3	0	1	34
EXOC4	chr11	1158073	+	rs28691231	T	C	0	1	SYNONYMOUS_CODING	C->C	1	7.2544e-12	9.41088e-05	4	0	0	20
EZR	chr18	9129858	+	rs11660603	G	A	0	1	INTRON		1	1.8578e-12	3.37826e-06	6	0	0	21
FARP1	chr17	29595108	+	rs12150521	C	T	0	1	INTRON		1	1.2146e-13	0.000384615	3	0	0	23
FARP1	chr10	83784431	+	rs10748870	T	A	0	1	INTRON		1	5.4567e-19	1.69765e-05	4	0	0	32
FARP1	chr10	83804209	+	rs7099539	A	G	0	1	INTRON		1	7.2544e-12	1.88218e-05	5	0	0	20
FARP1	chr10	83812532	+	rs7476767	T	G	0	1	INTRON		1	7.2544e-12	1.88218e-05	5	0	0	20
FARP1	chr10	83946635	+	rs1739764	T	C	0	1	INTRON		1	7.2544e-12	1.88218e-05	5	0	0	20
FARP1	chr10	83764504	+	rs6584459	T	C	0	1	INTRON		1	1.3074e-16	2.78087e-05	4	0	0	28
FBXO34	chr10	83776429	+	rs10509442	T	C	0	1	INTRON		1	1.8578e-12	7.90514e-05	4	0	0	21
FBXO34	chr10	83819125	+	rs4933824	T	G	0	1	INTRON		1	1.4508e-22	9.38086e-05	3	0	0	38
FBXO34	chr10	83814219	+	rs10884093	G	A	0	1	INTRON		1	3.101e-14	0.00034188	3	0	0	24
FBXO34	chr10	83804090	+	rs11192282	G	A	0	1	INTRON		1	7.2544e-12	0.000564653	3	0	0	20
FNDC3B	chr13	53608632	+	rs2298231	C	T	0	1	SYNONYMOUS_CODING	S->S	1	5.1363e-16	3.17813e-05	4	0	0	27
FOS	chr6	52231469	+	rs6927270	T	C	0	1	INTRON		1	1.8578e-12	3.37826e-06	6	0	0	21
FOS	chr5	58843656	-	rs17797996	G	C	0	1	INTRON		1	3.101e-14	3.8029e-07	7	0	0	24
FOS	chr2	10933249	-	rs4799	C	T	0	0.394737	SYNONYMOUS_CODING	R->R	1	2.5804e-11	2.46894e-07	42	0	46	30
FRMD4B	chr7	106546087	+	rs3173908	C	T	0	1	UTR_3_PRIME		1	7.9107e-15	1.35818e-06	6	0	0	25
FTX	chr5	67596088	+	rs3756668	G	A	0	1	UTR_3_PRIME		1	3.101e-14	1.68414e-06	6	0	0	24
FYCO1	chr8	42045655	-	rs2070713	C	T	0	1	EXON		1	2.3541e-24	7.29526e-07	5	0	0	41
FYCO1	chr8	42045655	-	rs2070713	C	T	0	1	INTRON		1	2.3541e-24	7.29526e-07	5	0	0	41
GALNT12	chr17	7404991	+	rs2228130	T	C	0	1	SYNONYMOUS_CODING	N->N	1	1.8578e-12	8.44566e-07	7	0	0	21
GALNT12	chr7	94900279	+	rs854527	G	A	0	1	INTRON		1	3.101e-14	3.8029e-07	7	0	0	24
GALNT12	chr17	64801021	+	rs12947438	A	G	0	1	UTR_3_PRIME		1	4.7526e-13	6.68896e-05	4	0	0	22
GALNT12	chr17	64400021	+	rs9303506	T	A	0	1	INTRON		1	4.7526e-13	6.40705e-07	7	0	0	22
GLIS3	chr17	64397699	+	rs6504426	A	G	0	1	INTRON		1	1.2146e-13	1.0175e-05	5	0	0	23
GMPS	chr8	141956904	-	rs12677559	T	C	0	1	INTRON		1	1.2146e-13	0.000384615	3	0	0	23
GNAI2P1	chr18	12786217	-	rs2847296	C	G	0	1	EXON		1	3.101e-14	4.884e-05	4	0	0	24
GNAI3	chr18	12786217	-	rs2847296	C	G	0	1	INTRON		1	3.101e-14	4.884e-05	4	0	0	24
GNAQ	chr1	44071221	+	rs631248	G	A	0	1	EXON		1	7.2544e-12	9.41088e-05	4	0	0	20
GNAQP1	chr1	44071221	+	rs631248	G	A	0	1	SYNONYMOUS_CODING	V->V	1	7.2544e-12	9.41088e-05	4	0	0	20
GPR107	chr2	20504066	-	rs6741559	C	T	0	1	INTRON		1	7.2544e-12	1.88218e-05	5	0	0	20
GPR110	chr19	8452102	-	rs11666003	G	A	0	1	INTRON		1	3.101e-14	1.68414e-06	6	0	0	24
GPR110	chr13	48928464	+	rs198620	G	A	0	1	INTRON		1	7.2544e-12	4.34348e-06	6	0	0	20
GPR110	chr13	50141362	-	rs9562900	G	A	0	1	SYNONYMOUS_CODING	I->I	1	7.9107e-15	1.35818e-06	6	0	0	25
GPR180	chr2	11321880	-	rs1129976	C	T	0	0.590909	UTR_3_PRIME		1	7.0445e-11	9.17971e-09	32	0	18	26
GPX1P1	chr18	9129858	-	rs11660603	G	A	0	1	INTRON		1	1.8578e-12	3.37826e-06	6	0	0	21
GRSF1	chr3	88181016	+	rs4501136	G	A	0	1	INTRON		1	4.7526e-13	6.40705e-07	7	0	0	22
GTF2A2	chr1	179416913	-	.	T	C	0	1	EXON		1	7.2544e-12	1.12609e-06	7	0	0	20
GTF3A	chr18	9129858	+	rs11660603	G	A	0	1	INTRON		1	1.8578e-12	3.37826e-06	6	0	0	21
HABP4	chr8	128214618	-	rs55678233	G	C	0	1	INTRON		1	1.3074e-16	1.48709e-07	7	0	0	28
HABP4	chr12	33139675	+	.	T	C	0	0.8	EXON		1	5.2605e-06	0.000703631	7	0	3	12
HDAC9	chr6	86137470	-	.	G	A	0	1	EXON		1	7.9107e-15	2.97101e-07	7	0	0	25
HDAC9	chr6	86137474	-	.	G	C	0	1	EXON		1	7.9107e-15	2.97101e-07	7	0	0	25
HIGD1A	chr6	86137477	-	.	T	C	0	1	EXON		1	7.9107e-15	2.97101e-07	7	0	0	25
HIGD1A	chr6	86137473	-	.	A	T	0	1	EXON		1	1.2146e-13	4.91207e-07	7	0	0	23
HIGD1A	chr6	86137439	-	.	G	A	0	1	EXON		1	7.9107e-15	1.35818e-06	6	0	0	25
HIGD1A	chr9	66698705	-	rs74677526	T	C	0	0.973333	INTRON		1	3.1521e-41	0.000131447	3	0	2	73
HIST1H2AC	chr1	43309548	-	rs1484324	G	A	0	1	INTRON		1	4.7526e-13	6.68896e-05	4	0	0	22
HLA-B	chr1	43309548	-	rs1484324	G	A	0	1	INTRON		1	4.7526e-13	6.68896e-05	4	0	0	22
HLA-B	chr1	43309548	-	rs1484324	G	A	0	1	INTRON		1	4.7526e-13	6.68896e-05	4	0	0	22
HLA-B	chr3	156532145	-	rs12492804	T	A	0	1	INTRON		1	7.2544e-12	1.12609e-06	7	0	0	20
HLA-B	chr3	156530170	-	rs343992	T	C	0	1	INTRON		1	7.2544e-12	0.000564653	3	0	0	20
HNRNPC	chr9	69834284	+	rs2809232	C	G	0	1	INTRON		1	9.9117e-30	4.26876e-05	3	0	0	50
HSD17B2	chr6	147124907	-	.	A	G	0	1	EXON		1	7.2544e-12	4.34348e-06	6	0	0	20
HSDL2	chr6	147124909	-	.	T	C	0	1	EXON		1	7.2544e-12	4.34348e-06	6	0	0	20
IAH1	chr17	64400021	-	rs9303506	T	A	0	1	EXON		1	4.7526e-13	6.40705e-07	7	0	0	22
IAH1	chr17	64400021	-	rs9303506	T	A	0	1	INTRON		1	4.7526e-13	6.40705e-07	7	0	0	22
IAH1	chr17	64397699	-	rs6504426	A	G	0	1	INTRON		1	1.2146e-13	1.0175e-05	5	0	0	23
IFIT2	chr16	82081505	-	rs8044837	T	C	0	1	INTRON		1	5.4567e-19	2.29412e-06	5	0	0	32
IFIT2	chr3	98377663	+	.	T	C	0	0.952381	EXON		1	4.0873e-11	6.75653e-06	7	0	1	20
IFIT5	chr3	98377659	+	.	A	T	0	0.95	EXON		1	1.5234e-10	9.0087e-06	7	0	1	19
INIP	chr3	98377664	+	.	A	G	0	0.85	EXON		1	1.2848e-08	0.000135131	7	0	3	17
INIP	chr11	69847636	+	rs2015337	A	G	0	1	INTRON		1	7.2544e-12	1.88218e-05	5	0	0	20
INIP	chr11	69846968	+	rs7103124	C	T	0	1	INTRON		1	1.2146e-13	0.000384615	3	0	0	23
INPP4B	chr3	169169979	+	rs78357734	G	T	0	0.88	INTRON		1	2.5916e-11	0.000114087	6	0	3	22
INPP4B	chr15	23813497	-	rs59329234	C	T	0	1	INTRON		1	4.7526e-13	2.65435e-06	6	0	0	22
INPP4B	chrX	115052780	-	rs67732154	G	T	0	1	INTRON		1	7.2544e-12	9.41088e-05	4	0	0	20
INPP4B	chr6	72093117	-	rs9455451	G	A	0	1	INTRON		1	3.101e-14	1.68414e-06	6	0	0	24
INPP4B	chrX	73435386	-	rs174210	C	T	0	1	INTRON		1	7.9107e-15	7.01725e-06	5	0	0	25
INTS6-AS1	chr1	38022059	+	.	T	C	0	0.894737	EXON		1	5.9414e-09	5.47279e-05	7	0	2	17
INTS6P1	chr11	18261203	-	rs11024576	G	A	0	1	UTR_3_PRIME		1	4.7526e-13	0.000434783	3	0	0	22
IQCB1	chr11	18261203	-	rs11024576	G	A	0	1	INTRON		1	4.7526e-13	0.000434783	3	0	0	22
IRX5	chr1	169847683	-	rs6683056	G	A	0	1	INTRON		1	7.2544e-12	1.12609e-06	7	0	0	20
ITGB8	chr7	37991129	-	rs2722279	C	A	0	1	INTRON		1	4.1752e-38	7.62684e-09	6	0	0	64
KATNAL1	chr7	37988589	-	rs2044831	C	T	0	0.977778	INTRON		1	4.4304e-25	3.88685e-07	6	0	1	44
KATNAL1	chr5	36686404	+	rs2229894	G	A	0	1	UTR_3_PRIME		1	2.1486e-18	4.30147e-07	6	0	0	31
KHDC1	chr3	140696799	+	rs9829128	C	T	0	0.956522	UTR_3_PRIME		1	2.9149e-12	3.92966e-06	7	0	1	22
KIAA1731	chr12	21013641	+	rs2417942	A	C	0	1	INTRON		1	1.8578e-12	3.37826e-06	6	0	0	21
KIAA1731	chr12	21013641	+	rs2417942	A	C	0	1	INTRON		1	1.8578e-12	3.37826e-06	6	0	0	21
KIDINS220	chr12	21013641	+	rs2417942	A	C	0	1	INTRON		1	1.8578e-12	3.37826e-06	6	0	0	21
KIDINS220	chr13	45169473	+	.	G	A	0	1	EXON		1	7.9107e-15	1.35818e-06	6	0	0	25
KIDINS220	chr17	18220770	+	rs1563632	G	A	0	1	NON_SYNONYMOUS_CODING	R->H	1	1.2146e-13	4.91207e-07	7	0	0	23
KLHDC8B	chr5	139936760	-	rs250426	G	T	0	1	EXON		1	1.2146e-13	4.91207e-07	7	0	0	23
KLHDC8B	chr5	139936760	-	rs250426	G	T	0	1	SYNONYMOUS_CODING	V->V	1	1.2146e-13	4.91207e-07	7	0	0	23
KPNA3	chr3	133539635	+	.	G	A	0	0.244444	INTRON		1	0.00024398	1.93425e-05	67	0	34	11
KRIT1	chr2	202275922	+	.	C	T	0	0.9	INTRON		1	1.6758e-09	0.000395257	5	0	2	18
KRT23	chr2	108920497	+	rs6746883	C	G	0	1	EXON		1	3.101e-14	8.4207e-06	5	0	0	24
LARS2	chr2	108925780	+	rs1047312	T	C	0	1	UTR_3_PRIME		1	8.9137e-21	3.70668e-08	7	0	0	35
LCN2	chr2	108920497	+	rs6746883	C	G	0	1	INTRON		1	3.101e-14	8.4207e-06	5	0	0	24
LCN2	chr3	176892298	-	rs6443432	T	A	0	1	INTRON		1	1.8578e-12	3.37826e-06	6	0	0	21
LEPREL4	chr3	176900080	-	rs1997394	T	C	0	1	INTRON		1	7.2544e-12	0.000564653	3	0	0	20
LEPREL4	chr16	19473265	+	rs12924813	T	C	0	1	INTRON		1	1.8578e-12	7.90514e-05	4	0	0	21
LIMD1	chr7	134849280	+	rs292501	T	A	0	1	NON_SYNONYMOUS_CODING	F->L	1	1.2146e-13	2.10517e-06	6	0	0	23
LINC00472	chr19	16799326	+	rs2250060	T	C	0	1	UTR_3_PRIME		1	5.4567e-19	3.62229e-07	6	0	0	32
LINS	chr19	16799326	+	rs2250060	T	C	0	1	INTRON		1	5.4567e-19	3.62229e-07	6	0	0	32
LINS	chr2	112854054	+	rs4241121	G	A	0	1	INTRON		1	7.2544e-12	4.34348e-06	6	0	0	20
LIPA	chr3	188752967	+	rs849004	T	C	0	1	INTRON		1	7.2544e-12	1.88218e-05	5	0	0	20
LIPA	chr3	42265369	+	rs3774391	C	T	0	1	EXON		1	4.7526e-13	6.40705e-07	7	0	0	22
LRCH1	chr3	42265634	+	rs1043610	C	T	0	0.95	EXON		1	1.5234e-10	9.0087e-06	7	0	1	19
LRIG1	chr3	42265369	+	rs3774391	C	T	0	1	UTR_3_PRIME		1	4.7526e-13	6.40705e-07	7	0	0	22
LRIG1	chr3	42265634	+	rs1043610	C	T	0	0.95	UTR_3_PRIME		1	1.5234e-10	9.0087e-06	7	0	1	19
LUC7L3	chr2	202275922	-	.	C	T	0	0.9	INTRON		1	1.6758e-09	0.000395257	5	0	2	18
LY6G5B	chr2	12858202	+	rs509761	C	T	0	0.551724	UTR_5_PRIME		1	5.693e-13	5.72977e-05	15	0	26	32
MACC1	chr2	12858202	+	rs509761	C	T	0	0.551724	INTRON		1	5.693e-13	5.72977e-05	15	0	26	32
MACC1	chr7	46039487	-	.	T	C	0	1	EXON		1	7.2544e-12	4.34348e-06	6	0	0	20
MACC1	chr13	113139568	-	rs8381	G	A	0	1	UTR_3_PRIME		1	3.101e-14	0.00034188	3	0	0	24
MACC1	chr1	26609259	-	rs7522905	C	T	0	1	EXON		1	7.2544e-12	1.12609e-06	7	0	0	20
MACC1	chr1	26609259	-	rs7522905	C	T	0	1	SYNONYMOUS_CODING	T->T	1	7.2544e-12	1.12609e-06	7	0	0	20
MACC1	chr2	234557414	+	rs28444828	T	C	0	1	INTRON		1	9.3017e-24	1.59004e-08	7	0	0	40
MAGI1	chr2	234562491	+	rs1580064	T	C	0	1	INTRON		1	1.8578e-12	8.44566e-07	7	0	0	21
MAGI1	chr2	234567601	+	rs2741043	G	A	0	0.965517	INTRON		1	9.9776e-16	9.5835e-07	7	0	1	28
MAGI1	chr2	234550970	+	rs4663272	G	A	0	1	INTRON		1	1.2146e-13	1.0175e-05	5	0	0	23
MAGI1	chr2	234555809	+	rs2741035	G	A	0	1	INTRON		1	4.7526e-13	1.2387e-05	5	0	0	22
MAGI1	chr2	234557414	+	rs28444828	T	C	0	1	INTRON		1	9.3017e-24	1.59004e-08	7	0	0	40
MAGI1	chr2	234557414	+	rs28444828	T	C	0	1	INTRON		1	9.3017e-24	1.59004e-08	7	0	0	40
MAGI1	chr2	234529391	+	rs13400017	A	G	0	1	INTRON		1	1.3074e-16	1.48709e-07	7	0	0	28
MANBA	chr2	234562491	+	rs1580064	T	C	0	1	INTRON		1	1.8578e-12	8.44566e-07	7	0	0	21
MAP3K1	chr2	234567601	+	rs2741043	G	A	0	0.965517	INTRON		1	9.9776e-16	9.5835e-07	7	0	1	28
MBNL1	chr2	234529643	+	rs6431558	C	T	0	0.95	INTRON		1	8.0088e-21	2.98928e-06	6	0	2	38
MBNL2	chr2	234550970	+	rs4663272	G	A	0	1	INTRON		1	1.2146e-13	1.0175e-05	5	0	0	23
MCOLN3	chr2	234555809	+	rs2741035	G	A	0	1	INTRON		1	4.7526e-13	1.2387e-05	5	0	0	22
MCOLN3	chr2	234539381	+	rs28969975	T	A	0	1	INTRON		1	4.7526e-13	6.68896e-05	4	0	0	22
ME1	chr12	95693407	+	rs7976638	A	G	0	0.863636	EXON		1	1.0931e-09	7.68846e-05	7	0	3	19
MECOM	chr12	95693407	+	rs7976638	A	G	0	0.863636	INTRON		1	1.0931e-09	7.68846e-05	7	0	3	19
MECOM	chr11	124620587	-	rs61910625	C	T	0	1	INTRON		1	1.8578e-12	3.37826e-06	6	0	0	21
MEF2AP1	chr2	20131079	-	rs1191778	T	C	0	0.95	NON_SYNONYMOUS_CODING	E->G	1	1.5234e-10	0.000112931	5	0	1	19
MET	chr2	20131079	-	rs1191778	T	C	0	0.95	UTR_3_PRIME		1	1.5234e-10	0.000112931	5	0	1	19
MET	chr1	85484366	+	rs7522239	A	G	0	1	INTRON		1	2.1486e-18	7.92377e-08	7	0	0	31
MGST1	chr16	79246078	+	rs2288032	G	A	0	1	EXON		1	7.9107e-15	7.01725e-06	5	0	0	25
MKRN3	chr16	79246078	+	rs2288032	G	A	0	1	UTR_3_PRIME		1	7.9107e-15	7.01725e-06	5	0	0	25
MKRN3	chr20	21283998	+	.	C	T	0	0.809524	START_GAINED		1	2.3502e-08	5.1294e-06	12	0	4	17
MKRN3	chr19	44832875	-	rs2722722	A	G	0	1	NON_SYNONYMOUS_CODING	Y->H	1	2.0165e-15	2.3408e-07	7	0	0	26
MKRN9P	chr3	88188420	+	rs9813894	G	A	0	1	UTR_5_PRIME		1	5.1363e-16	9.02879e-07	6	0	0	27
MRPL50	chr3	75785577	-	rs78397123	T	A	0	1	UTR_3_PRIME		1	7.2544e-12	1.88218e-05	5	0	0	20
MRPL50	chr3	75785577	-	rs78397123	T	A	0	1	INTRON		1	7.2544e-12	1.88218e-05	5	0	0	20
MRPL50	chrX	13397179	-	.	A	G	0.0138889	0.210526	EXON		0.5	0.00012806	0.000226699	71	1	45	12
MRPL50	chr7	20217104	-	rs3094996	A	T	0.0294118	0.365079	INTRON		0.5	1.0144e-08	0.000138604	33	1	40	23
MTMR3	chr2	10942687	-	rs4758	C	T	0.0136986	0.452381	EXON		0.5	1.5419e-14	1.39896e-11	72	1	46	38
MUC4	chr2	10942687	-	rs4758	C	T	0.0136986	0.452381	SYNONYMOUS_CODING	S->S	0.5	1.5419e-14	1.39896e-11	72	1	46	38
MUC4	chrX	13397179	+	.	A	G	0.0138889	0.210526	INTRON		0.5	0.00012806	0.000226699	71	1	45	12
MUC4	chr7	20228294	-	rs57815400	A	G	0.0666667	0.464286	INTRON		0.24576	1.9812e-05	0.000731204	28	2	15	13
MUC4	chr7	20222140	-	rs3114468	G	A	0.181818	0.85	INTRON		0.2381	1.2848e-08	0.000459253	9	2	3	17
MUC4	chr2	8871342	-	rs1044280	C	A	0.0769231	0.519231	NON_SYNONYMOUS_CODING	Q->H	0.12013	7.3303e-11	5.22579e-06	36	3	25	27
MUC4	chr2	8871342	-	rs1044280	C	A	0.0769231	0.519231	UTR_3_PRIME		0.12013	7.3303e-11	5.22579e-06	36	3	25	27
MUC4	chr2	8871342	-	rs1044280	C	A	0.0769231	0.519231	INTRON		0.12013	7.3303e-11	5.22579e-06	36	3	25	27
MUC4	chr2	29120733	+	rs4577244	C	T	0.0810811	0.46875	INTRON		0.11986	3.5464e-06	0.000310133	34	3	17	15
MUC4	chr10	81926702	-	rs1049550	G	A	0.173913	0.757576	NON_SYNONYMOUS_CODING	R->C	0.054264	1.3235e-11	2.74491e-05	19	4	8	25
MUC4	chr10	81926702	-	rs1049550	G	A	0.173913	0.757576	EXON		0.054264	1.3235e-11	2.74491e-05	19	4	8	25
MUC4	chr9	139317979	+	rs1130640	C	T	0.181818	0.727273	UTR_3_PRIME		0.053885	1.7905e-07	0.00066787	18	4	6	16
MUC4	chr9	139311471	+	rs3812581	C	T	0.25	0.791667	EXON		0.023562	3.6826e-09	0.000643834	15	5	5	19
MUC4	chr9	139311471	+	rs3812581	C	T	0.25	0.791667	SYNONYMOUS_CODING	N->N	0.023562	3.6826e-09	0.000643834	15	5	5	19
MUC4	chr7	6728859	+	rs35825898	A	G	0.157895	0.545455	INTRON		0.012628	7.4746e-10	0.000461771	32	6	20	24
MUC4	chr7	6728859	-	rs35825898	A	G	0.157895	0.545455	UTR_3_PRIME		0.012628	7.4746e-10	0.000461771	32	6	20	24
MUC4	chr9	106856910	+	rs4743687	C	T	0.171429	0.580645	UTR_5_PRIME		0.01238	1.1154e-07	0.000798584	29	6	13	18
MUC4	chr9	106856910	+	rs4743687	C	T	0.171429	0.580645	INTRON		0.01238	1.1154e-07	0.000798584	29	6	13	18
MUC4	chr3	112252532	-	rs3732817	A	G	0.214286	0.625	UTR_3_PRIME		0.011603	1.0643e-12	0.000759413	22	6	18	30
MUC4	chr3	112252532	-	rs3732817	A	G	0.214286	0.625	INTRON		0.011603	1.0643e-12	0.000759413	22	6	18	30
MUC4	chr10	91067438	+	rs4934470	T	C	0.352941	0.909091	UTR_3_PRIME		0.0092021	1.3117e-10	0.000430268	11	6	2	20
MUC4	chr10	91067438	-	rs4934470	T	C	0.352941	0.909091	INTRON		0.0092021	1.3117e-10	0.000430268	11	6	2	20
MUC5AC	chrX	44168902	-	.	A	G	0.0316742	0.430233	INTRON		0.0074447	9.199e-41	2.60787e-27	214	7	147	111
NANS	chrX	44168902	-	.	A	G	0.0316742	0.430233	EXON		0.0074447	9.199e-41	2.60787e-27	214	7	147	111
NANS	chr3	33907945	+	rs3183987	A	G	0.0985915	0.345238	EXON		0.0066905	9.9366e-11	0.000266693	64	7	55	29
NAP1L4P1	chr3	33907945	+	rs3183987	A	G	0.0985915	0.345238	SYNONYMOUS_CODING	P->P	0.0066905	9.9366e-11	0.000266693	64	7	55	29
NDUFV2	chr9	139318071	+	rs7628	A	G	0.28125	0.724138	UTR_3_PRIME		0.0010185	1.2841e-09	0.000806629	23	9	8	21
NF1	chr9	100885142	-	rs701378	C	T	0.384615	0.862069	UTR_3_PRIME		0.00033576	1.3609e-12	0.000297017	16	10	4	25
NIN	chr9	115447935	-	rs786963	T	C	0.229167	0.606061	UTR_3_PRIME		0.00025621	1.4096e-08	0.00099846	37	11	13	20
NIN	chr1	89447978	-	rs10754258	T	A	0.255814	0.631579	INTRON		0.00023512	2.5665e-10	0.000812471	32	11	14	24
NIN	chr1	89447978	-	rs10754258	T	A	0.255814	0.631579	UTR_3_PRIME		0.00023512	2.5665e-10	0.000812471	32	11	14	24
NKTR	chr3	17051543	+	rs148553225	C	T	0.282051	0	EXON		0.00021547	1	0.000704959	28	11	32	0
NLRP2	chr3	17051543	+	rs148553225	C	T	0.282051	0	SYNONYMOUS_CODING	S->S	0.00021547	1	0.000704959	28	11	32	0
NLRP2	chr11	93402006	+	rs61743303	A	G	0.387097	0	UTR_5_PRIME		6.5329e-05	1	0.000738197	19	12	21	0
NRG3	chr11	93402006	+	rs61743303	A	G	0.387097	0	SYNONYMOUS_CODING	A->A	6.5329e-05	1	0.000738197	19	12	21	0
NRG3	chr8	144996260	-	.	C	A	0.236364	0	STOP_GAINED	E->*	5.473e-05	1	2.63735e-05	42	13	61	0
NRG3	chr9	115447964	-	rs77466035	A	T	0.325	0.813953	UTR_3_PRIME		3.8184e-05	9.5933e-17	7.36799e-06	27	13	8	35
NRG3	chr9	115447961	-	rs78931835	G	T	0.325	0.795455	UTR_3_PRIME		3.8184e-05	1.6883e-16	2.00357e-05	27	13	9	35
NRG3	chr7	22256988	-	rs1419759	T	C	1	0.315789	INTRON		2.0568e-05	0.009828	0.000860174	0	9	13	6
NRG3	chr7	17365574	+	rs73079677	A	G	0.234375	0.505495	INTRON		1.2069e-05	6.249e-18	0.000804078	49	15	45	46
NRG3	chr3	45719561	+	rs3796361	G	A	0.234375	0.566372	UTR_3_PRIME		1.2069e-05	1.5848e-25	1.94212e-05	49	15	49	64
NRG3	chr16	68598007	+	rs1177648	A	G	0.4375	0.923077	EXON		9.8512e-06	7.6222e-13	9.67777e-05	18	14	2	24
NRG3	chr16	68598007	+	rs1177648	A	G	0.4375	0.923077	UTR_3_PRIME		9.8512e-06	7.6222e-13	9.67777e-05	18	14	2	24
NSUN2	chr16	68598007	+	rs1177648	A	G	0.4375	0.923077	SYNONYMOUS_CODING	Q->Q	9.8512e-06	7.6222e-13	9.67777e-05	18	14	2	24
OLFM4	chr16	68598007	+	rs1177648	A	G	0.4375	0.923077	INTRON		9.8512e-06	7.6222e-13	9.67777e-05	18	14	2	24
OXSR1	chr14	55818517	+	rs1045002	T	A	0.306122	0.62069	NON_SYNONYMOUS_CODING	I->N	8.6234e-06	1.4473e-29	0.000299913	34	15	44	72
PA2G4P4	chr14	55818517	+	rs1045002	T	A	0.306122	0.62069	EXON		8.6234e-06	1.4473e-29	0.000299913	34	15	44	72
PABPC1	chr14	55818517	+	rs1045002	T	A	0.306122	0.62069	INTRON		8.6234e-06	1.4473e-29	0.000299913	34	15	44	72
PALM2-AKAP2	chr9	139317869	+	rs1130635	T	C	0.275862	0.680851	UTR_3_PRIME		4.6015e-06	5.7239e-14	6.56453e-05	42	16	15	32
PALM2-AKAP2	chr6	74002624	+	.	G	T	0.410256	0	EXON		2.1927e-06	1	4.79286e-07	23	16	46	0
PAQR8	chr6	74002624	-	.	G	T	0.410256	0	INTRON		2.1927e-06	1	4.79286e-07	23	16	46	0
PCDH11X	chr6	74002624	+	.	G	T	0.410256	0	INTRON		2.1927e-06	1	4.79286e-07	23	16	46	0
PDCD6IP	chr3	33877626	+	rs3792594	G	A	0.182692	0.413793	NON_SYNONYMOUS_CODING	A->T	7.7252e-07	1.8416e-26	6.71573e-05	85	19	102	72
PDCD6IP	chr3	33877626	+	rs3792594	G	A	0.182692	0.413793	EXON		7.7252e-07	1.8416e-26	6.71573e-05	85	19	102	72
PDCD6IP	chr3	33877626	+	rs3792594	G	A	0.182692	0.413793	UTR_3_PRIME		7.7252e-07	1.8416e-26	6.71573e-05	85	19	102	72
PDCD6IP	chr15	89744575	+	.	G	A	0.275362	0.0807453	UTR_3_PRIME		4.534e-07	9.487e-05	0.000257784	50	19	148	13
PDCD6IP	chr15	89744575	-	.	G	A	0.275362	0.0807453	EXON		4.534e-07	9.487e-05	0.000257784	50	19	148	13
PDE4D	chr9	80335562	-	.	C	A	0.316667	0	UTR_3_PRIME		3.5049e-07	1	2.95688e-10	41	19	110	0
PDIA6	chr15	89744580	+	.	C	T	0.253165	0.0838323	UTR_3_PRIME		2.4079e-07	4.5945e-05	0.000617478	59	20	153	14
PDIA6	chr15	89744580	-	.	C	T	0.253165	0.0838323	EXON		2.4079e-07	4.5945e-05	0.000617478	59	20	153	14
PDIA6	chr15	89744577	+	.	G	A	0.27027	0.0807453	UTR_3_PRIME		2.1616e-07	9.487e-05	0.000210601	54	20	148	13
PHF14	chr15	89744577	-	.	G	A	0.27027	0.0807453	EXON		2.1616e-07	9.487e-05	0.000210601	54	20	148	13
PHF14	chr9	125003751	-	rs10739606	T	C	0.277778	0.6	UTR_3_PRIME		2.0601e-07	4.2756e-16	0.000253757	52	20	26	39
PHF14	chr4	103672812	-	.	T	C	0.8	0	INTRON		7.7086e-08	1	0.000912131	4	16	6	0
PIK3CG	chrX	91368176	+	.	T	C	0.8	0	INTRON		7.7086e-08	1	0.000371609	4	16	7	0
PIK3R1	chr4	103672812	+	.	T	C	0.8	0	EXON		7.7086e-08	1	0.000912131	4	16	6	0
PLAT	chr15	89744583	+	.	G	A	0.271605	0.0828025	UTR_3_PRIME		4.5762e-08	9.4237e-05	0.000183719	59	22	144	13
PLAT	chr15	89744583	-	.	G	A	0.271605	0.0828025	EXON		4.5762e-08	9.4237e-05	0.000183719	59	22	144	13
PLCL2	chr11	111753122	+	.	C	G	0.323529	0	NON_SYNONYMOUS_CODING	P->A	3.133e-08	1	1.0022e-07	46	22	62	0
PLCL2	chr11	111753122	+	.	C	G	0.323529	0	UTR_5_PRIME		3.133e-08	1	1.0022e-07	46	22	62	0
PLEC	chr2	44394008	+	.	A	G	0.809524	0	EXON		2.3502e-08	1	0.000278707	4	17	7	0
PLEKHA8P1	chr15	89744570	+	.	G	T	0.270588	0.0867052	UTR_3_PRIME		2.1305e-08	2.223e-05	0.000268221	62	23	158	15
PMPCA	chr15	89744570	-	.	G	T	0.270588	0.0867052	EXON		2.1305e-08	2.223e-05	0.000268221	62	23	158	15
PMPCA	chr2	27185317	-	rs6745807	A	C	0.85	0	INTRON		1.2848e-08	1	0.000135131	3	17	7	0
PMPCA	chr2	47335559	-	rs34047921	C	G	0.552632	0.0588235	INTRON		9.9016e-09	0.5	0.000718379	17	21	16	1
PMPCA	chr2	47335559	-	rs34047921	C	G	0.552632	0.0588235	EXON		9.9016e-09	0.5	0.000718379	17	21	16	1
PMPCA	chr2	47335559	-	rs34047921	C	G	0.552632	0.0588235	INTRON		9.9016e-09	0.5	0.000718379	17	21	16	1
PNN	chr2	11320473	-	rs79361777	T	G	0.941176	0.225806	UTR_3_PRIME		7.7134e-09	0.0053469	1.72291e-06	1	16	24	7
PNN	chr3	42825115	-	rs6442067	C	T	0.818182	0.296296	INTRON		7.1052e-09	0.0021337	0.000447197	4	18	19	8
POLR1D	chr9	108472574	-	.	G	A	0.894737	0	EXON		5.9414e-09	1	0.000158103	2	17	6	0
POLR2A	chr9	108472574	+	.	G	A	0.894737	0	INTRON		5.9414e-09	1	0.000158103	2	17	6	0
PPARG	chr8	59337994	-	.	T	C	0.857143	0	EXON		3.7603e-09	1	0.000851323	3	18	5	0
PPARG	chr8	59337994	+	.	T	C	0.857143	0	INTRON		3.7603e-09	1	0.000851323	3	18	5	0
PPARG	chr8	59337995	-	.	G	A	0.826087	0	EXON		2.1316e-09	1	0.000162098	4	19	7	0
PPARG	chr8	59337995	+	.	G	A	0.826087	0	INTRON		2.1316e-09	1	0.000162098	4	19	7	0
PPP1R9A	chr5	866717	-	rs58733412	C	T	0.769231	0	INTRON		1.8273e-09	1	0.000401681	6	20	7	0
PPP2R5E	chr7	16904681	-	rs372370852	A	G	0.9	0.277778	INTRON		1.6758e-09	0.022727	0.000155328	2	18	13	5
PRDX2P1	chr7	16904684	-	.	A	G	0.9	0.277778	INTRON		1.6758e-09	0.022727	0.000155328	2	18	13	5
PRDX2P1	chr8	101726477	-	rs3115894	C	T	0.9	0	INTRON		1.6758e-09	1	0.000121618	2	18	6	0
PRKCA	chr7	16904681	-	rs372370852	A	G	0.9	0.277778	EXON		1.6758e-09	0.022727	0.000155328	2	18	13	5
PRKCA	chr7	16904684	-	.	A	G	0.9	0.277778	EXON		1.6758e-09	0.022727	0.000155328	2	18	13	5
PRKCA	chr9	115634639	+	rs1324930	C	T	0.647059	0.206897	UTR_3_PRIME		1.3675e-09	0.011736	0.000802357	12	22	23	6
PRKG1	chr9	115634639	+	rs1324930	C	T	0.647059	0.206897	INTRON		1.3675e-09	0.011736	0.000802357	12	22	23	6
PSMA4	chr9	98734519	+	rs188610453	C	T	0.521739	0.148936	NON_SYNONYMOUS_CODING	T->I	9.761e-10	0.0061442	0.000165101	22	24	40	7
PSMA4	chr9	98734519	+	rs188610453	C	T	0.521739	0.148936	UTR_3_PRIME		9.761e-10	0.0061442	0.000165101	22	24	40	7
PSMA4	chr9	99250463	+	rs7030316	C	T	0.521739	0.888889	EXON		9.761e-10	2.0653e-16	0.000642838	22	24	4	32
PSMA4	chr9	99250463	+	rs7030316	C	T	0.521739	0.888889	SYNONYMOUS_CODING	L->L	9.761e-10	2.0653e-16	0.000642838	22	24	4	32
PTEN	chr15	89744619	+	rs1127674	G	A	0.329268	0.124183	UTR_3_PRIME		5.7096e-10	1.0518e-06	0.000256251	55	27	134	19
PTK2	chr15	89744619	-	rs1127674	G	A	0.329268	0.124183	EXON		5.7096e-10	1.0518e-06	0.000256251	55	27	134	19
PTPN2	chr15	51236972	+	.	T	C	0.904762	0	INTRON		4.7003e-10	1	9.45914e-05	2	19	6	0
PTPN2	chr15	51236972	+	.	T	C	0.904762	0	EXON		4.7003e-10	1	9.45914e-05	2	19	6	0
PTPRF	chr13	30870510	-	.	T	C	0.904762	0	INTRON		4.7003e-10	1	3.04044e-05	2	19	7	0
PTPRF	chr13	30870510	+	.	T	C	0.904762	0	EXON		4.7003e-10	1	3.04044e-05	2	19	7	0
PUM2	chr3	112000429	-	.	G	A	0.904762	0	INTRON		4.7003e-10	1	3.04044e-05	2	19	7	0
QSOX2	chr1	175013948	-	.	G	A	0.733333	0.230769	EXON		4.1351e-10	0.011309	0.00038979	8	22	20	6
RAB10	chr3	155633939	+	.	C	A	0.224806	0	SYNONYMOUS_CODING	T->T	3.1612e-10	1	4.73227e-12	100	29	167	0
RAB11B-AS1	chr13	28226678	+	rs655885	G	A	0.84	0	INTRON		1.8789e-10	1	0.000285217	4	21	6	0
RAD17P1	chr15	89744607	+	rs1044182	G	A	0.29	0.11413	UTR_3_PRIME		1.7268e-10	2.6048e-07	0.00030516	71	29	163	21
RAD17P1	chr15	89744607	-	rs1044182	G	A	0.29	0.11413	EXON		1.7268e-10	2.6048e-07	0.00030516	71	29	163	21
RAP1B	chr14	51224417	-	rs2236316	G	C	0.666667	0.255319	NON_SYNONYMOUS_CODING	P->A	1.5744e-10	0.00010942	0.000296044	12	24	35	12
RAPGEF5	chr14	51224417	-	rs2236316	G	C	0.666667	0.255319	EXON		1.5744e-10	0.00010942	0.000296044	12	24	35	12
RB1	chr14	51224417	-	rs2236316	G	C	0.666667	0.255319	INTRON		1.5744e-10	0.00010942	0.000296044	12	24	35	12
RBM18	chr6	83920884	-	rs1180245	A	G	0.95	0	UTR_3_PRIME		1.5234e-10	1	3.04044e-05	1	19	6	0
RBMXL1	chr2	132218979	+	rs139595030	G	T	0.95	0	EXON		1.5234e-10	1	3.04044e-05	1	19	6	0
RCBTB1	chr17	4475557	+	.	C	T	0.909091	0	EXON		1.3117e-10	1	0.000260126	2	20	5	0
RFC5	chr2	26359128	+	rs3791730	T	A	0.4375	0.184	UTR_3_PRIME		8.2552e-11	3.9134e-08	0.000445124	36	28	102	23
RFWD3	chr9	101496342	-	rs453409	T	C	0.65	0.179487	UTR_3_PRIME		3.0187e-11	0.0058219	3.02951e-05	14	26	32	7
RFWD3	chr9	101496342	-	rs453409	T	C	0.65	0.179487	INTRON		3.0187e-11	0.0058219	3.02951e-05	14	26	32	7
RFWD3	chr9	139099451	-	rs10117333	A	C	0.714286	0.235294	UTR_3_PRIME		2.8437e-11	0.0024562	9.65008e-05	10	25	26	8
RFWD3	chr15	89744628	+	rs1127673	G	A	0.356322	0.135484	UTR_3_PRIME		1.7783e-11	2.3071e-07	0.000136188	56	31	134	21
RFWD3	chr15	89744628	-	rs1127673	G	A	0.356322	0.135484	EXON		1.7783e-11	2.3071e-07	0.000136188	56	31	134	21
RFWD3	chr3	45960646	-	rs1994492	T	C	0.757576	0.354839	UTR_3_PRIME		1.3235e-11	2.4621e-08	0.000228669	8	25	40	22
RFWD3	chr3	45960646	-	rs1994492	T	C	0.757576	0.354839	INTRON		1.3235e-11	2.4621e-08	0.000228669	8	25	40	22
RFWD3	chr12	118466938	+	rs5745876	G	A	0.954545	0	INTRON		1.0931e-11	1	5.12564e-06	1	21	7	0
RHOQP2	chr15	51236948	+	.	A	G	0.916667	0	INTRON		1.0078e-11	1	1.36904e-05	2	22	7	0
ROCK2	chr15	51236950	+	.	C	T	0.916667	0	INTRON		1.0078e-11	1	1.36904e-05	2	22	7	0
ROCK2	chr15	51236948	+	.	A	G	0.916667	0	EXON		1.0078e-11	1	1.36904e-05	2	22	7	0
ROCK2	chr15	51236950	+	.	C	T	0.916667	0	EXON		1.0078e-11	1	1.36904e-05	2	22	7	0
ROCK2	chr13	27998769	+	rs1049302	T	C	0.916667	0	UTR_5_PRIME		1.0078e-11	1	4.71559e-05	2	22	6	0
ROCK2	chr15	71456487	-	rs200452465	T	C	0.916667	0	INTRON		1.0078e-11	1	0.000176835	2	22	5	0
ROCK2	chr15	71456487	+	rs200452465	T	C	0.916667	0	INTRON		1.0078e-11	1	0.000176835	2	22	5	0
RP11-10L12.2	chr2	3193040	-	rs17682	G	A	1	0.428571	EXON		7.2544e-12	3.7193e-07	4.10367e-06	0	20	24	18
RP11-114M5.1	chr2	3193040	-	rs17682	G	A	1	0.428571	UTR_3_PRIME		7.2544e-12	3.7193e-07	4.10367e-06	0	20	24	18
RP11-114M5.1	chr9	136197834	-	rs12335	G	A	0.622222	0.211538	UTR_3_PRIME		7.1237e-12	0.00027081	6.28253e-05	17	28	41	11
RP11-141J13.4	chr6	31321803	-	rs3180225	G	A	0.11465	0.220588	EXON		5.0218e-12	2.2264e-20	0.000731103	278	36	212	60
RP11-143J12.2	chr6	31321803	-	rs3180225	G	A	0.11465	0.220588	UTR_3_PRIME		5.0218e-12	2.2264e-20	0.000731103	278	36	212	60
RP11-159G9.5	chr4	154228983	-	.	T	C	0.92	0	EXON		2.7767e-12	1	0.000631552	2	23	4	0
RP11-18B3.3	chr4	154228983	+	.	T	C	0.92	0	INTRON		2.7767e-12	1	0.000631552	2	23	4	0
RP11-1L9.1	chr9	112900199	+	rs914358	T	C	0.833333	0	NON_SYNONYMOUS_CODING	L->S	2.745e-12	1	3.54269e-06	5	25	10	0
RP11-215I23.4	chr9	112900199	+	rs914358	T	C	0.833333	0	INTRON		2.745e-12	1	3.54269e-06	5	25	10	0
RP11-21J18.1	chr9	112900199	+	rs914358	T	C	0.833333	0	NON_SYNONYMOUS_CODING	L->S	2.745e-12	1	3.54269e-06	5	25	10	0
RP11-23F23.3	chr10	75473052	-	rs150352103	G	A	0.787879	0.25	EXON		2.5824e-12	0.050612	0.000490318	7	26	12	4
RP11-255B23.4	chr10	75473052	-	rs150352103	G	A	0.787879	0.25	EXON		2.5824e-12	0.050612	0.000490318	7	26	12	4
RP11-255H23.2	chr10	75473052	-	rs150352103	G	A	0.787879	0.25	EXON		2.5824e-12	0.050612	0.000490318	7	26	12	4
RP11-255H23.2	chr13	29274633	-	rs4769636	T	C	0.958333	0	EXON		7.7525e-13	1	3.04232e-06	1	23	7	0
RP11-255H23.4	chr13	29274633	-	rs4769636	T	C	0.958333	0	UTR_3_PRIME		7.7525e-13	1	3.04232e-06	1	23	7	0
RP11-255H23.4	chr5	6608150	-	rs1366297	T	C	0.923077	0	INTRON		7.6222e-13	1	8.42687e-06	2	24	7	0
RP11-267D19.2	chr2	43783565	-	.	A	G	0.542373	0	UTR_3_PRIME		6.5868e-13	1	2.1104e-15	27	32	79	0
RP11-30P6.3	chr2	43783565	-	.	A	G	0.542373	0	SYNONYMOUS_CODING	L->L	6.5868e-13	1	2.1104e-15	27	32	79	0
RP11-30P6.3	chr2	43783565	-	.	A	G	0.542373	0	INTRON		6.5868e-13	1	2.1104e-15	27	32	79	0
RP11-30P6.3	chr15	89744557	+	.	G	A	0.384615	0.148148	UTR_3_PRIME		4.963e-13	2.3768e-08	4.2337e-05	56	35	138	24
RP11-30P6.3	chr15	89744557	-	.	G	A	0.384615	0.148148	EXON		4.963e-13	2.3768e-08	4.2337e-05	56	35	138	24
RP11-30P6.3	chr9	101496346	-	rs439347	G	A	0.681818	0.184211	UTR_3_PRIME		3.8642e-13	0.0057727	6.82757e-06	14	30	31	7
RP11-318K12.1	chr9	101496346	-	rs439347	G	A	0.681818	0.184211	INTRON		3.8642e-13	0.0057727	6.82757e-06	14	30	31	7
RP11-326A19.5	chr9	101611545	+	rs2273847	A	G	0.465753	0.150442	EXON		3.6826e-13	3.9836e-06	3.95332e-06	39	34	96	17
RP11-326A19.5	chr9	101611545	+	rs2273847	A	G	0.465753	0.150442	UTR_3_PRIME		3.6826e-13	3.9836e-06	3.95332e-06	39	34	96	17
RP11-326A19.5	chr9	101611545	-	rs2273847	A	G	0.465753	0.150442	EXON		3.6826e-13	3.9836e-06	3.95332e-06	39	34	96	17
RP11-326A19.5	chr9	101611545	-	rs2273847	A	G	0.465753	0.150442	INTRON		3.6826e-13	3.9836e-06	3.95332e-06	39	34	96	17
RP11-326A19.5	chr15	89744549	+	.	G	T	0.333333	0.153439	UTR_3_PRIME		8.8652e-14	5.8219e-10	0.000341761	76	38	160	29
RP11-326A19.5	chr15	89744549	-	.	G	T	0.333333	0.153439	EXON		8.8652e-14	5.8219e-10	0.000341761	76	38	160	29
RP11-326A19.5	chr10	89705580	+	.	C	T	0.931034	0	INTRON		1.5465e-14	1	4.31258e-06	2	27	7	0
RP11-326A19.5	chr10	89705580	+	.	C	T	0.931034	0	EXON		1.5465e-14	1	4.31258e-06	2	27	7	0
RP11-326A19.5	chr3	151507750	-	rs1401970	C	T	0.962963	0	INTRON		1.4382e-14	1	6.32015e-06	1	26	6	0
RP11-326A19.5	chr19	55494085	+	.	C	A	0.438202	0	NON_SYNONYMOUS_CODING	A->D	8.3706e-15	1	3.88525e-14	50	39	83	0
RP11-326A19.5	chr19	55494085	+	.	C	A	0.438202	0	EXON		8.3706e-15	1	3.88525e-14	50	39	83	0
RP11-326A19.5	chr7	21941669	-	rs1128226	A	C	0.209524	0.393519	EXON		4.5817e-15	8.0491e-31	3.76803e-05	166	44	131	85
RP11-326A19.5	chr7	21941669	-	rs1128226	A	C	0.209524	0.393519	UTR_3_PRIME		4.5817e-15	8.0491e-31	3.76803e-05	166	44	131	85
RP11-326A19.5	chr9	106902422	+	rs10991117	C	T	0.434783	0.734177	UTR_3_PRIME		3.841e-15	8.8178e-26	9.83065e-05	52	40	21	58
RP11-326A19.5	chr13	30870544	-	.	T	C	0.964286	0	INTRON		3.7915e-15	1	5.20483e-06	1	27	6	0
RP11-326A19.5	chr13	30870544	+	.	T	C	0.964286	0	EXON		3.7915e-15	1	5.20483e-06	1	27	6	0
RP11-326A19.5	chr14	58752341	-	.	C	G	0.587302	0.25	INTRON		3.4211e-15	5.1909e-05	0.000329748	26	37	39	13
RP11-326A19.5	chr14	58752341	-	.	C	G	0.587302	0.25	EXON		3.4211e-15	5.1909e-05	0.000329748	26	37	39	13
RP11-326A19.5	chr14	58752341	-	.	C	G	0.587302	0.25	INTRON		3.4211e-15	5.1909e-05	0.000329748	26	37	39	13
RP11-32M23.4	chr8	34731801	+	rs111228227	G	A	0.882353	0	EXON		2.5943e-15	1	0.000218842	4	30	5	0
RP11-342M1.2	chr19	47422537	+	.	G	T	0.282051	0.00558659	NON_SYNONYMOUS_CODING	C->F	1.6511e-15	0.5	1.61191e-15	112	44	178	1
RP11-342M1.3	chr22	24270354	+	.	T	C	0.965517	0	EXON		9.9776e-16	1	2.15629e-05	1	28	5	0
RP11-342M1.4	chr13	52035490	+	.	G	A	0.965517	0.6	INTRON		9.9776e-16	6.019e-09	0.000713635	1	28	14	21
RP11-349A22.5	chr10	91066769	+	rs1727	C	A	0.383929	0.62931	NON_SYNONYMOUS_CODING	D->E	7.4961e-16	3.9802e-30	0.000326835	69	43	43	73
RP11-349A22.5	chr10	91066769	-	rs1727	C	A	0.383929	0.62931	INTRON		7.4961e-16	3.9802e-30	0.000326835	69	43	43	73
RP11-380G5.3	chr9	132573438	+	rs17418918	T	G	0.72	0.35	UTR_3_PRIME		4.7433e-16	1.5388e-05	0.000613241	14	36	26	14
RP11-392A22.2	chr15	89744541	+	.	A	G	0.354331	0.15566	UTR_3_PRIME		2.4304e-16	3.0173e-11	5.19596e-05	82	45	179	33
RP11-392A22.2	chr15	89744541	-	.	A	G	0.354331	0.15566	EXON		2.4304e-16	3.0173e-11	5.19596e-05	82	45	179	33
RP11-392A22.2	chr20	43954028	-	.	C	A	0.319728	0	UTR_3_PRIME		8.7785e-17	1	4.04578e-21	100	47	211	0
RP11-398K22.12	chr1	117076080	-	rs1131082	G	C	0.939394	0.583333	INTRON		8.2416e-17	7.2058e-09	0.000651575	2	31	15	21
RP11-454C18.2	chr1	117076080	-	rs1131082	G	C	0.939394	0.583333	EXON		8.2416e-17	7.2058e-09	0.000651575	2	31	15	21
RP11-454C18.2	chr9	79997881	+	rs10869921	T	C	0.552632	0.816327	UTR_3_PRIME		7.7351e-17	9.8345e-38	0.000219103	34	42	18	80
RP11-460N11.2	chr9	79997881	+	rs10869921	T	C	0.552632	0.816327	INTRON		7.7351e-17	9.8345e-38	0.000219103	34	42	18	80
RP11-464F9.1	chr9	102732237	+	rs9556	T	C	0.420561	0.728972	UTR_3_PRIME		7.7111e-17	2.3524e-34	8.15658e-06	62	45	29	78
RP11-464F9.1	chr3	151503394	-	rs62272864	G	A	0.967742	0	INTRON		6.8754e-17	1	6.33902e-07	1	30	7	0
RP11-464F9.1	chr15	89745025	+	rs1044161	A	G	0.684211	0.382716	UTR_3_PRIME		6.1741e-17	1.3131e-11	0.000560737	18	39	50	31
RP11-497D6.2	chr3	42687628	+	.	T	C	0.833333	0.394737	UTR_3_PRIME		5.1164e-17	5.4463e-06	6.92138e-05	7	35	23	15
RP11-497D6.2	chr3	42687628	-	.	T	C	0.833333	0.394737	INTRON		5.1164e-17	5.4463e-06	6.92138e-05	7	35	23	15
RP11-4F22.2	chr14	63841891	-	rs3742624	A	G	0.379032	0.617512	UTR_3_PRIME		3.1666e-17	2.1008e-54	2.78066e-05	77	47	83	134
RP11-4F22.2	chr15	89744661	+	rs1044178	C	A	0.412281	0.224599	UTR_3_PRIME		1.7216e-17	1.6952e-14	0.00069429	67	47	145	42
RP11-4F22.2	chr15	89744661	-	rs1044178	C	A	0.412281	0.224599	EXON		1.7216e-17	1.6952e-14	0.00069429	67	47	145	42
RP11-510J16.5	chr1	119575232	-	rs1057990	T	C	0.672131	0.317073	UTR_3_PRIME		1.2248e-17	3.9497e-05	0.000564326	20	41	28	13
RP11-54D18.4	chr15	89744869	+	.	C	T	0.578947	0.266667	UTR_3_PRIME		7.2383e-18	2.1377e-11	2.08326e-05	32	44	88	32
RP11-556K13.1	chr15	89744869	-	.	C	T	0.578947	0.266667	EXON		7.2383e-18	2.1377e-11	2.08326e-05	32	44	88	32
RP11-569H14.1	chr2	11320741	-	rs72785466	A	G	0.969697	0.389831	UTR_3_PRIME		4.7095e-18	8.221e-09	7.83487e-09	1	32	36	23
RP11-569H14.1	chr11	4232462	-	.	G	A	0.969697	0	EXON		4.7095e-18	1	2.14551e-06	1	32	6	0
RP11-569H14.1	chr11	57509622	+	.	C	T	0.239819	0	NON_SYNONYMOUS_CODING	P->L	3.1934e-18	1	7.09477e-14	168	53	150	0
RP11-615I2.7	chr11	57509622	+	.	C	T	0.239819	0	EXON		3.1934e-18	1	7.09477e-14	168	53	150	0
RP11-626H12.1	chr11	57509622	+	.	C	T	0.239819	0	INTRON		3.1934e-18	1	7.09477e-14	168	53	150	0
RP11-626H12.1	chr16	74655634	-	rs1138860	G	C	0.970588	0.53125	UTR_3_PRIME		1.2301e-18	1.3489e-13	2.33425e-06	1	33	30	34
RP11-641D5.2	chr2	3589803	-	rs10153531	A	G	0.970588	0.361702	INTRON		1.2301e-18	1.3018e-06	5.33032e-09	1	33	30	17
RP11-673C5.2	chr15	89744870	+	.	A	G	0.582278	0.283333	UTR_3_PRIME		1.0977e-18	3.8011e-12	3.29197e-05	33	46	86	34
RP11-697E2.7	chr15	89744870	-	.	A	G	0.582278	0.283333	EXON		1.0977e-18	3.8011e-12	3.29197e-05	33	46	86	34
RP11-734J24.1	chr15	89744469	+	.	T	C	0.404762	0.195402	UTR_3_PRIME		7.4124e-19	9.7459e-12	9.21039e-05	75	51	140	34
RP11-73C9.1	chr15	89744469	-	.	T	C	0.404762	0.195402	EXON		7.4124e-19	9.7459e-12	9.21039e-05	75	51	140	34
RP11-761E20.1	chr15	89745019	+	.	G	T	0.6875	0.397727	UTR_3_PRIME		4.4825e-19	4.1616e-13	0.000532367	20	44	53	35
RP11-92C4.3	chr15	89744470	+	.	T	C	0.422764	0.201183	UTR_3_PRIME		2.2391e-19	9.1882e-12	5.21161e-05	71	52	135	34
RP11-92C4.3	chr15	89744470	-	.	T	C	0.422764	0.201183	EXON		2.2391e-19	9.1882e-12	5.21161e-05	71	52	135	34
RP11-92C4.3	chr15	89744872	+	rs16949949	G	T	0.592593	0.280992	UTR_3_PRIME		1.3809e-19	3.9028e-12	1.15439e-05	33	48	87	34
RP11-92C4.3	chr15	89744872	-	rs16949949	G	T	0.592593	0.280992	EXON		1.3809e-19	3.9028e-12	1.15439e-05	33	48	87	34
RP13-512J5.1	chr3	12369716	+	.	G	A	0.925	0.575758	EXON		1.1479e-19	1.7361e-15	0.000124399	3	37	28	38
RP3-331H24.5	chr3	12369716	+	.	G	A	0.925	0.575758	INTRON		1.1479e-19	1.7361e-15	0.000124399	3	37	28	38
RP3-368A4.5	chr22	24271706	+	.	G	A	0.972222	0	EXON		8.3613e-20	1	2.48261e-07	1	35	7	0
RP3-423B22.5	chr9	132900076	+	rs1306	T	C	0.807692	0.449275	UTR_3_PRIME		6.7918e-20	5.8009e-12	7.25364e-05	10	42	38	31
RP4-613B23.1	chr10	91178703	+	rs41284950	T	C	0.762712	0.37037	UTR_3_PRIME		1.518e-20	0.00035253	0.000673622	14	45	17	10
RPL14P1	chr9	101611335	+	rs2273846	G	C	0.363057	0.201878	EXON		1.3412e-20	1.074e-14	0.000859935	100	57	170	43
RPSA	chr9	101611335	+	rs2273846	G	C	0.363057	0.201878	SYNONYMOUS_CODING	S->S	1.3412e-20	1.074e-14	0.000859935	100	57	170	43
RPSA	chr9	101611335	-	rs2273846	G	C	0.363057	0.201878	EXON		1.3412e-20	1.074e-14	0.000859935	100	57	170	43
RPSAP58	chr9	101611335	-	rs2273846	G	C	0.363057	0.201878	INTRON		1.3412e-20	1.074e-14	0.000859935	100	57	170	43
RPSAP58	chr14	51101529	-	rs1054275	T	A	0.419118	0.617021	UTR_3_PRIME		3.8638e-21	3.6662e-47	0.000474055	79	57	72	116
RRM2	chr14	51101529	-	rs1054275	T	A	0.419118	0.617021	INTRON		3.8638e-21	3.6662e-47	0.000474055	79	57	72	116
RRM2P3	chr7	17379110	+	rs2066853	G	A	0.239382	0.419355	NON_SYNONYMOUS_CODING	R->K	3.4013e-21	4.9648e-38	1.91112e-05	197	62	144	104
RXRA	chr7	17379110	+	rs2066853	G	A	0.239382	0.419355	EXON		3.4013e-21	4.9648e-38	1.91112e-05	197	62	144	104
SAA2	chr1	102252784	-	.	G	A	0.319149	0.571429	INTRON		3.1256e-21	5.0718e-49	4.92838e-07	128	60	93	124
SAA2-SAA4	chr16	74655848	-	rs7185722	G	A	0.975	0.575758	UTR_3_PRIME		3.8137e-22	4.7323e-08	2.32546e-05	1	39	14	19
SAR1A	chr9	98734891	+	rs3780574	A	T	0.42069	0.204225	START_GAINED		1.3581e-22	3.7895e-10	7.96709e-05	84	61	113	29
SAV1	chr9	98734891	+	rs3780574	A	T	0.42069	0.204225	UTR_3_PRIME		1.3581e-22	3.7895e-10	7.96709e-05	84	61	113	29
SAV1	chr12	69036813	+	.	T	C	0.954545	0.625	INTRON		3.9431e-23	1.196e-06	0.000864776	2	42	9	15
SAV1	chr9	100823135	+	rs1058446	G	C	0.439716	0.256983	NON_SYNONYMOUS_CODING	E->D	3.646e-23	5.1182e-16	0.000820882	79	62	133	46
SAV1	chr9	100823135	+	rs1058446	G	C	0.439716	0.256983	EXON		3.646e-23	5.1182e-16	0.000820882	79	62	133	46
SC22CB-1E7.1	chr9	138825117	-	rs6569	A	C	0.626374	0.35	EXON		1.3028e-23	7.7821e-13	0.000160811	34	57	65	35
SCYL3	chr9	138825117	-	rs6569	A	C	0.626374	0.35	UTR_3_PRIME		1.3028e-23	7.7821e-13	0.000160811	34	57	65	35
SDC4	chr16	74655923	-	.	G	T	1	0.634921	UTR_3_PRIME		9.3017e-24	7.8324e-17	3.39852e-06	0	40	23	40
SDCCAG3P2	chr2	11320340	-	rs72785465	C	T	1	0.404494	UTR_3_PRIME		9.3017e-24	1.6693e-13	2.04455e-12	0	40	53	36
SFRP4	chr7	116435768	+	rs41736	C	T	0.739726	0.350515	SYNONYMOUS_CODING	D->D	3.89e-24	1.721e-12	5.45325e-07	19	54	63	34
SFRP4	chr3	12369661	+	.	C	A	0.921569	0.473684	EXON		8.5347e-25	5.9795e-14	1.16637e-07	4	47	40	36
SLC1A3	chr3	12369661	+	.	C	A	0.921569	0.473684	INTRON		8.5347e-25	5.9795e-14	1.16637e-07	4	47	40	36
SLC25A36	chr15	90818693	+	.	A	G	0.909091	0.619048	EXON		5.5432e-26	4.7626e-11	0.00094106	5	50	16	26
SLC46A3	chr3	38167095	-	rs2229528	A	G	0.868852	0.56962	NON_SYNONYMOUS_CODING	V->A	2.1815e-26	3.6481e-18	0.000160645	8	53	34	45
SLC46A3	chr3	38167095	-	rs2229528	A	G	0.868852	0.56962	EXON		2.1815e-26	3.6481e-18	0.000160645	8	53	34	45
SLC9C1	chr3	38167095	-	rs2229528	A	G	0.868852	0.56962	UTR_3_PRIME		2.1815e-26	3.6481e-18	0.000160645	8	53	34	45
SLCO1B3	chr2	10271196	+	rs1138729	A	G	0.943396	0.540984	UTR_3_PRIME		4.4193e-27	2.783e-13	6.8196e-07	3	50	28	33
SLCO1B3	chr2	11322957	-	rs72785468	A	T	0.979592	0.389474	UTR_3_PRIME		1.9625e-27	9.1084e-14	1.48439e-13	1	48	58	37
SLCO1B7	chr2	11351865	-	rs55932113	T	C	0.979592	0.5	SYNONYMOUS_CODING	L->L	1.9625e-27	5.2507e-16	9.90568e-10	1	48	41	41
SMARCE1P5	chr11	93472964	-	rs7105804	C	T	0.830986	0.5	INTRON		2.599e-28	2.9283e-09	0.000188789	12	59	23	23
SMC2	chr3	12369645	+	.	A	G	0.888889	0.54321	EXON		1.9864e-28	1.6045e-17	7.98013e-06	7	56	37	44
SMC2	chr3	12369645	+	.	A	G	0.888889	0.54321	INTRON		1.9864e-28	1.6045e-17	7.98013e-06	7	56	37	44
SMC2	chr16	74695079	-	rs8058922	G	T	1	0.728395	NON_SYNONYMOUS_CODING	T->N	1.554e-28	4.1535e-26	1.45323e-05	0	48	22	59
SMCR8	chr16	74695079	-	rs8058922	G	T	1	0.728395	EXON		1.554e-28	4.1535e-26	1.45323e-05	0	48	22	59
SNX30	chr16	74695079	-	rs8058922	G	T	1	0.728395	INTRON		1.554e-28	4.1535e-26	1.45323e-05	0	48	22	59
SNX30	chr3	12369641	+	.	A	G	0.903226	0.575	EXON		7.1971e-29	1.3078e-18	1.1617e-05	6	56	34	46
SRA1	chr3	12369641	+	.	A	G	0.903226	0.575	INTRON		7.1971e-29	1.3078e-18	1.1617e-05	6	56	34	46
SRA1	chr14	55765751	+	.	G	A	0.962963	0.653333	EXON		6.1952e-29	1.0149e-20	1.01402e-05	2	52	26	49
SRPRB	chr14	55765751	+	.	G	A	0.962963	0.653333	INTRON		6.1952e-29	1.0149e-20	1.01402e-05	2	52	26	49
STRADB	chr5	1317949	-	rs1801075	C	T	0.287671	0.136752	UTR_3_PRIME		4.7252e-29	7.4665e-11	3.28966e-05	208	84	202	32
STX17	chr7	20177333	-	rs10254700	G	A	0.736842	0.485981	INTRON		4.6021e-31	5.5055e-20	0.000311237	25	70	55	52
SULT1C2	chr7	20177333	-	rs10254700	G	A	0.736842	0.485981	UTR_3_PRIME		4.6021e-31	5.5055e-20	0.000311237	25	70	55	52
SULT1C2	chr9	112931646	+	rs1047469	G	A	0.657895	0.162791	UTR_3_PRIME		1.6984e-31	0.0059972	2.63804e-08	39	75	36	7
SULT1C2	chr9	112931646	+	rs1047469	G	A	0.657895	0.162791	UTR_3_PRIME		1.6984e-31	0.0059972	2.63804e-08	39	75	36	7
SURF6	chr4	77879992	+	.	A	G	0.574468	0.29	INTRON		2.7208e-32	1.7268e-10	1.37831e-05	60	81	71	29
TAF1D	chr14	39650234	+	rs2180792	A	T	0.548387	0.357616	NON_SYNONYMOUS_CODING	T->S	2.3242e-33	1.6742e-19	0.000884443	70	85	97	54
TBL1XR1	chr14	39650234	+	rs2180792	A	T	0.548387	0.357616	INTRON		2.3242e-33	1.6742e-19	0.000884443	70	85	97	54
TBL1XR1	chr7	16832382	-	rs8071	T	A	0.239336	0.447566	UTR_3_PRIME		4.3362e-34	8.932e-88	2.05448e-11	321	101	295	239
TFAM	chr6	31637807	+	rs4569	C	T	0.608696	0.346939	EXON		3.8156e-34	2.2744e-18	1.08918e-05	54	84	96	51
THADA	chr6	31637807	+	rs4569	C	T	0.608696	0.346939	UTR_3_PRIME		3.8156e-34	2.2744e-18	1.08918e-05	54	84	96	51
THADA	chr6	31637807	+	rs4569	C	T	0.608696	0.346939	INTRON		3.8156e-34	2.2744e-18	1.08918e-05	54	84	96	51
THADA	chr9	115234611	+	rs7096	G	A	0.625899	0.378378	UTR_3_PRIME		1.0267e-35	1.8471e-15	0.000126793	52	87	69	42
THSD4	chr9	115234611	-	rs7096	G	A	0.625899	0.378378	INTRON		1.0267e-35	1.8471e-15	0.000126793	52	87	69	42
TMC5	chr9	137332311	+	rs1045570	T	G	0.606667	0.35814	EXON		6.7831e-37	1.5752e-27	3.96388e-06	59	91	138	77
TMEM140	chr10	53458047	-	rs3740228	A	G	0.739496	0.5	SYNONYMOUS_CODING	R->R	5.4617e-39	1.6866e-29	6.31779e-05	31	88	77	77
TMEM38A	chr10	53458047	+	rs3740228	A	G	0.739496	0.5	INTRON		5.4617e-39	1.6866e-29	6.31779e-05	31	88	77	77
TMEM38A	chr15	89744864	+	.	T	C	0.729508	0.453333	UTR_3_PRIME		3.8718e-39	1.6329e-25	4.66751e-06	33	89	82	68
TMEM38B	chr15	89744864	-	.	T	C	0.729508	0.453333	EXON		3.8718e-39	1.6329e-25	4.66751e-06	33	89	82	68
TMEM87B	chr19	24009956	+	.	C	T	0.289926	0.497512	INTRON		1.424e-40	1.6811e-75	1.96657e-09	289	118	202	200
TMX2-CTNND1	chr19	24009956	-	.	C	T	0.289926	0.497512	EXON		1.424e-40	1.6811e-75	1.96657e-09	289	118	202	200
TOR1B	chr19	24009956	+	.	C	T	0.289926	0.497512	UTR_5_PRIME		1.424e-40	1.6811e-75	1.96657e-09	289	118	202	200
TPRG1	chr7	20178865	-	rs2241056	C	T	0.247951	0.354839	INTRON		7.5431e-41	2.6571e-54	0.000413395	367	121	280	154
TRAK1	chr7	20178865	-	rs2241056	C	T	0.247951	0.354839	UTR_3_PRIME		7.5431e-41	2.6571e-54	0.000413395	367	121	280	154
TRAK1	chr7	20180717	-	rs3735615	C	G	0.277778	0.408983	NON_SYNONYMOUS_CODING	R->T	4.9352e-41	1.6606e-62	5.45716e-05	312	120	250	173
TRAK1	chr2	3504687	-	rs9950	A	G	0.986486	0.383333	SYNONYMOUS_CODING	D->D	3.2103e-42	6.6078e-17	3.46575e-20	1	73	74	46
TRAK1	chr14	50092134	-	rs8952	A	T	0.559585	0.369427	UTR_3_PRIME		1.739e-42	5.2187e-21	0.000554045	85	108	99	58
TRAK2	chr7	6063283	+	rs4560	C	T	0.675325	0.469799	SYNONYMOUS_CODING	N->N	5.9568e-44	1.8381e-26	0.000322411	50	104	79	70
TRIB2	chr7	6063283	-	rs4560	C	T	0.675325	0.469799	UTR_3_PRIME		5.9568e-44	1.8381e-26	0.000322411	50	104	79	70
TRIB2	chr12	45567853	-	rs112846478	G	A	0.88	0.659574	EXON		4.8779e-44	3.6364e-26	0.000284519	12	88	32	62
TRIM2	chr16	74657485	-	rs8058133	A	T	1	0.68	UTR_3_PRIME		1.0773e-44	5.029e-29	2.10545e-09	0	75	32	68
TSPAN13	chr15	89744476	+	rs6416547	G	T	0.820896	0.604167	UTR_3_PRIME		6.4898e-52	8.5474e-47	2.95752e-05	24	110	76	116
TSSC1	chr15	89744476	-	rs6416547	G	T	0.820896	0.604167	EXON		6.4898e-52	8.5474e-47	2.95752e-05	24	110	76	116
TSSC1	chr12	63359098	+	.	C	T	0.649485	0.427136	EXON		3.1134e-52	2.5422e-31	1.26919e-05	68	126	114	85
TTC4P1	chr7	5568965	-	.	T	A	0.318812	0.214777	NON_SYNONYMOUS_CODING	I->F	8.123e-56	1.3353e-41	0.000109179	344	161	457	125
TUBGCP3	chr7	5568965	-	.	T	A	0.318812	0.214777	EXON		8.123e-56	1.3353e-41	0.000109179	344	161	457	125
TXN	chr7	5568965	-	.	T	A	0.318812	0.214777	INTRON		8.123e-56	1.3353e-41	0.000109179	344	161	457	125
TXN	chr16	74657421	-	rs7204804	T	C	1	0.707547	UTR_3_PRIME		1.1023e-56	1.4762e-32	4.08969e-10	0	95	31	75
UBAC1	chr7	116437206	+	rs41738	A	G	0.536913	0.364261	UTR_3_PRIME		7.6145e-62	9.4726e-38	3.32873e-05	138	160	185	106
UBAC1	chr3	42826041	-	rs6865	T	G	0.685185	0.371257	EXON		1.0102e-62	3.4397e-44	5.38592e-13	68	148	210	124
UBXN11	chr3	42826041	-	rs6865	T	G	0.685185	0.371257	UTR_3_PRIME		1.0102e-62	3.4397e-44	5.38592e-13	68	148	210	124
UBXN11	chr3	42826041	-	rs6865	T	G	0.685185	0.371257	INTRON		1.0102e-62	3.4397e-44	5.38592e-13	68	148	210	124
UBXN2B	chr14	51101641	-	rs2934693	G	A	0.383648	0.533981	UTR_3_PRIME		2.8037e-65	1.1374e-105	2.33087e-06	294	183	240	275
UBXN2B	chr14	51101641	-	rs2934693	G	A	0.383648	0.533981	INTRON		2.8037e-65	1.1374e-105	2.33087e-06	294	183	240	275
UGT1A10	chr3	39449770	+	rs3772140	T	G	0.912752	0.735294	EXON		2.2045e-70	5.5177e-55	3.72284e-05	13	136	45	125
UGT1A10	chr3	39449770	+	rs3772140	T	G	0.912752	0.735294	INTRON		2.2045e-70	5.5177e-55	3.72284e-05	13	136	45	125
UGT1A10	chr9	113006420	-	rs5843	A	G	0.543027	0.349153	EXON		6.8942e-71	1.9016e-36	1.0236e-06	154	183	192	103
UGT1A10	chr9	113006420	-	rs5843	A	G	0.543027	0.349153	UTR_3_PRIME		6.8942e-71	1.9016e-36	1.0236e-06	154	183	192	103
UGT1A10	chr1	110135308	+	rs7371	G	A	0.705882	0.534591	UTR_3_PRIME		2.8699e-77	4.1632e-33	0.000505065	75	180	74	85
UGT1A13P	chr15	78841220	+	rs8053	T	C	0.436293	0.608769	STOP_LOST	*->R	1.4527e-82	9.187e-145	9.91916e-09	292	226	232	361
UGT1A8	chr15	78841220	+	rs8053	T	C	0.436293	0.608769	EXON		1.4527e-82	9.187e-145	9.91916e-09	292	226	232	361
UGT1A8	chr15	78841220	+	rs8053	T	C	0.436293	0.608769	UTR_3_PRIME		1.4527e-82	9.187e-145	9.91916e-09	292	226	232	361
UGT1A8	chr15	78841220	+	rs8053	T	C	0.436293	0.608769	SYNONYMOUS_CODING	H->H	1.4527e-82	9.187e-145	9.91916e-09	292	226	232	361
UGT1A8	chr10	60155120	+	rs1049432	G	T	0.636364	0.443503	UTR_3_PRIME		4.3218e-83	9.1423e-58	6.80174e-07	116	203	197	157
UGT1A8	chr7	11022564	+	rs218965	G	A	0.711679	0.550296	EXON		5.2253e-84	2.4507e-72	5.44374e-05	79	195	152	186
UGT1A8	chr7	11022564	+	rs218965	G	A	0.711679	0.550296	SYNONYMOUS_CODING	A->A	5.2253e-84	2.4507e-72	5.44374e-05	79	195	152	186
UGT1A8	chr7	11022564	+	rs218965	G	A	0.711679	0.550296	INTRON		5.2253e-84	2.4507e-72	5.44374e-05	79	195	152	186
UGT1A8	chr22	32435634	+	.	T	C	0.361481	0.220779	EXON		6.5618e-86	4.8347e-62	1.65409e-09	431	244	660	187
VEZT	chr9	104152846	-	rs8131	G	A	0.466926	0.285078	NON_SYNONYMOUS_CODING	L->F	5.0576e-89	7.3393e-44	6.72139e-09	274	240	321	128
VEZT	chr9	104152846	-	rs8131	G	A	0.466926	0.285078	INTRON		5.0576e-89	7.3393e-44	6.72139e-09	274	240	321	128
VPS13A	chr3	38296817	+	rs2011	G	A	0.796226	0.591331	UTR_3_PRIME		4.8821e-97	4.5677e-76	1.20965e-07	54	211	132	191
VPS13A	chr9	104152790	-	rs17853010	G	C	0.432258	0.262357	SYNONYMOUS_CODING	A->A	1.3758e-97	8.945e-47	2.36789e-09	352	268	388	138
VSIG2	chr9	104152790	-	rs17853010	G	C	0.432258	0.262357	INTRON		1.3758e-97	8.945e-47	2.36789e-09	352	268	388	138
WARS2	chr7	16823095	+	rs11491	G	A	0.718935	0.53202	SYNONYMOUS_CODING	A->A	4.2074e-105	4.8229e-83	1.65875e-07	95	243	190	216
WDR35	chr16	88709737	-	rs1049255	C	T	0.642336	0.5	UTR_3_PRIME		2.689e-108	7.4625e-72	5.58262e-05	147	264	190	190
WDR35	chr7	21941439	-	rs12700325	A	G	0.735294	0.567797	EXON		1.9734e-109	6.522e-79	3.81061e-06	90	250	153	201
WDR43	chr7	21941439	-	rs12700325	A	G	0.735294	0.567797	UTR_3_PRIME		1.9734e-109	6.522e-79	3.81061e-06	90	250	153	201
WDR63	chr7	21941439	+	rs12700325	A	G	0.735294	0.567797	UTR_3_PRIME		1.9734e-109	6.522e-79	3.81061e-06	90	250	153	201
WWOX	chr10	71910630	-	rs1046747	G	A	0.720339	0.585965	UTR_3_PRIME		2.2269e-110	3.909e-132	4.28891e-05	99	255	236	334
WWOX	chr6	31321807	-	rs2770	G	A	0.871622	0.754789	EXON		3.222e-127	1.2238e-87	0.000424603	38	258	64	197
XRN2	chr6	31321807	-	rs2770	G	A	0.871622	0.754789	UTR_3_PRIME		3.222e-127	1.2238e-87	0.000424603	38	258	64	197
ZFP90	chr16	84599866	-	rs247862	A	G	0.678723	0.569507	EXON		6.1175e-134	1.1744e-99	0.000807258	151	319	192	254
ZFP90	chr16	84599866	-	rs247862	A	G	0.678723	0.569507	UTR_3_PRIME		6.1175e-134	1.1744e-99	0.000807258	151	319	192	254
ZFP90	chr9	15055490	+	.	A	G	0.995671	0.930481	EXON		5.251e-136	5.5675e-92	0.000191153	1	230	13	174
ZNF112	chr19	24010482	+	.	G	A	0.831643	0.590264	INTRON		3.9864e-194	1.6868e-115	5.11362e-17	83	410	202	291
ZNF12	chr19	24010482	-	.	G	A	0.831643	0.590264	INTRON		3.9864e-194	1.6868e-115	5.11362e-17	83	410	202	291
ZNF654	chr19	24010482	+	.	G	A	0.831643	0.590264	SYNONYMOUS_CODING	L->L	3.9864e-194	1.6868e-115	5.11362e-17	83	410	202	291
ZNF717	chr3	156527937	-	.	A	G	0.96729	0.911937	EXON		7.7253e-231	4.0364e-240	0.000411706	14	414	45	466
ZNF717	chr3	156527937	-	.	A	G	0.96729	0.911937	INTRON		7.7253e-231	4.0364e-240	0.000411706	14	414	45	466
