# Supplementary material for: Amplification of the Mutation-Carrying BRCA2 Allele Promotes RAD51 Loading and PARP Inhibitor Resistance in the Absence of Reversion Mutations
Source: Oxford University Press journal article supplement (doi:10.1158/1535-7163.mct-17-0256), 2019-10-01
Supplement: 15357163mct170256-sup-180805_3_supp_5774051_pxs0wn.xls [file 15357163mct170256-sup-180805_3_supp_5774051_pxs0wn.xls]

## Sheet: GENES
Table S1, Park and Yamamoto et al 2019
Gene Symbol	Fold Change (Resistant/CAPAN1)	p-value	FDR	Count		FPKM
				Resistant	CAPAN1	Resistant	CAPAN1
RP11-146N23.1	552.152	2.28e-35	3.45e-30	2643	5	43.62	0.079
ADAMTS12	142.242	3.35e-31	2.54e-26	3505	26	4.694	0.033
CDH17	75.4093	2.19e-29	1.11e-24	6138	85	19.531	0.259
RP11-85M11.2	120.707	6.69e-25	1.27e-20	1735	15	36.212	0.3
RNVU1-17	819	4e-23	6.06e-19	819	0	58.682	0
REG4	32.8293	1.19e-22	1.64e-18	7461	237	64.608	1.968
ANXA13	105.941	3.03e-21	3.25e-17	1217	12	9.005	0.085
COL5A2	31.3308	3.2e-21	3.25e-17	4873	162	8.24	0.263
BPIFB1	-90	2.91e-20	2.6e-16	12	1127	0.073	6.57
LYZ	-18.7862	1.08e-19	8.95e-16	1555	30464	32.746	615.174
BCHE	245.769	3.6e-18	2.37e-14	687	3	3.195	0.013
OLFM4	-15.4189	9.73e-18	5.46e-14	1598	25696	6.482	99.945
IL33	30.4796	1.04e-17	5.61e-14	2014	69	8.961	0.294
DOK5	-527	1.29e-17	6.73e-14	0	527	0	3.025
RNVU1-11	-102.415	4.04e-17	1.91e-13	7	748	0.508	52.027
LIN28B	64.8065	3.9e-17	1.91e-13	941	15	2.009	0.031
TMEM27	32.4367	4.99e-17	2.29e-13	1616	52	12.034	0.371
CALB1	-18.3177	6.13e-17	2.73e-13	207	3953	0.96	17.585
TM4SF20	35.7449	1.09e-16	4.72e-13	1369	40	7.006	0.196
NTS	478	1.65e-16	6.93e-13	478	0	4.541	0
SYNE1	-20.8717	5.05e-16	1.86e-12	100	2172	0.226	4.717
RP11-1143G9.4	-17.0875	2.75e-15	9.26e-12	148	2637	2.903	49.605
KRT20	17.8888	1.01e-14	3.32e-11	2401	140	16.243	0.908
VIL1	16.6855	1.36e-14	4.39e-11	2719	170	16.235	0.973
KCNQ3	-160.333	2.71e-14	8.57e-11	3	488	0.003	0.481
DMBT1	-10.3761	2.97e-14	9e-11	4158	44993	6.357	65.961
EPDR1	-14.18	4e-13	9.62e-10	135	1996	0.611	8.664
SPINK1	-9.01894	8.57e-13	2e-09	2129	20024	102.53	924.712
CRISPLD2	-9.50715	1.33e-12	2.84e-09	737	7306	1.889	17.959
XDH	-11.3281	1.42e-12	3e-09	248	2928	0.512	5.8
RGS2	8.92077	7.66e-12	1.49e-08	14063	1644	122.955	13.783
CLMP	29.0556	8.2e-12	1.57e-08	697	25	3.138	0.108
DPP4	12.3484	8.92e-12	1.69e-08	2084	176	6.273	0.508
DOCK8	-17.011	1.2e-11	2.16e-08	58	1024	0.091	1.548
F3	9.01112	1.23e-11	2.18e-08	8676	1004	44.578	4.947
HEPH	292	1.24e-11	2.18e-08	292	0	0.571	0
ANKFN1	-78.8667	1.97e-11	3.21e-08	5	403	0.015	1.183
FREM1	111.5	2.13e-11	3.4e-08	383	4	0.446	0.004
RP11-318K12.1	-9.93798	2.48e-11	3.87e-08	243	2519	1.967	19.548
CDK14	12.8054	2.66e-11	4.07e-08	1622	132	3.816	0.298
CSTA	-16.3834	2.89e-11	4.37e-08	57	974	0.892	14.614
EXOSC8	7.53272	1.44e-10	1.93e-07	18838	2608	270.613	35.925
SI	107.5	1.47e-10	1.95e-07	330	3	0.645	0.006
PSCA	-9.3737	2.25e-10	2.84e-07	200	1955	2.304	21.597
AKR7A3	12.2963	2.61e-10	3.19e-07	1274	108	8.755	0.712
KIAA1199	-13.354	2.88e-10	3.46e-07	70	977	0.113	1.509
MYRFL	17.1023	3.02e-10	3.54e-07	804	49	3.01	0.176
SLC6A14	-148	3.25e-10	3.73e-07	2	297	0.005	0.74
PADI1	-7.4401	4.78e-10	5.36e-07	511	3964	1.561	11.614
FST	8.8193	6.41e-10	7.04e-07	2469	292	11.518	1.306
NUPL1	6.77961	6.7e-10	7.3e-07	48368	7440	131.504	19.397
WSCD2	-38.6923	9.1e-10	9.55e-07	10	400	0.026	1.006
GTF3A	6.6753	1.05e-09	1.08e-06	29515	4611	504.105	75.518
GPX2	-6.2051	1.34e-09	1.29e-06	2163	13997	22.414	139.081
FAM198B	8.26039	1.68e-09	1.59e-06	2487	314	5.964	0.722
JPH3	-15.0538	2e-09	1.89e-06	44	692	0.13	1.957
DKK1	6.82187	2.62e-09	2.35e-06	6738	1030	44.233	6.484
POMP	6.24124	3.19e-09	2.79e-06	40451	6759	357.392	57.263
ADCY5	-7.52584	3.36e-09	2.91e-06	277	2173	0.445	3.349
FOS	-7.07871	3.63e-09	3.11e-06	364	2687	1.982	14.03
KCNS3	-7.7988	3.87e-09	3.26e-06	231	1878	1.163	9.07
KCNE3	-6.13867	4.08e-09	3.4e-06	1003	6421	3.75	23.02
PDE7B	-41.8235	5.54e-09	4.51e-06	8	340	0.017	0.711
RFC3	6.10207	5.79e-09	4.69e-06	23511	4018	115.018	18.849
ST6GALNAC5	236.054	6.66e-09	5.37e-06	231	1	0.724	0.003
LCN2	-5.5115	8.03e-09	6.4e-06	3991	22939	75.036	413.561
ALDH3A1	-6.44452	9.15e-09	7.11e-06	468	3145	3.091	19.92
MAGEA12	199	1.12e-08	8.36e-06	199	0	1.405	0
FCGBP	-12.5405	1.3e-08	9.48e-06	51	675	0.037	0.464
C7orf63	-7.33788	1.5e-08	1.04e-05	219	1677	0.66	4.843
MEF2C	9.18143	1.57e-08	1.06e-05	1196	136	2.176	0.237
KATNAL1	6.57262	1.77e-08	1.18e-05	3548	563	5.521	0.84
PCDH7	-6.37246	1.85e-08	1.22e-05	397	2639	0.69	4.397
SERPINB5	5.97055	1.88e-08	1.23e-05	8210	1434	34.665	5.806
PCDH20	-55	1.96e-08	1.27e-05	5	280	0.012	0.66
RPL21	5.7101	1.98e-08	1.28e-05	20199	3689	430.77	75.44
LAIR2	-17.5584	2.27e-08	1.42e-05	26	476	0.437	7.673
N4BP2L2	5.65368	3.01e-08	1.85e-05	13250	2444	190.806	33.749
ALG5	5.5091	3.59e-08	2.12e-05	20941	3964	231.272	41.98
SPG20	5.71182	3.57e-08	2.12e-05	8906	1626	21.168	3.706
LYPD1	16.827	3.58e-08	2.12e-05	501	31	3.113	0.185
FREM2	-9.67692	3.54e-08	2.12e-05	82	831	0.065	0.629
HAVCR1	9.56786	3.76e-08	2.16e-05	963	105	6.133	0.641
BRCA2	5.72771	4.08e-08	2.29e-05	7585	1381	44.321	7.738
LUM	15.5954	4.47e-08	2.45e-05	523	35	2.043	0.131
CPA3	181	4.7e-08	2.55e-05	181	0	1.185	0
MTMR6	5.38502	5.03e-08	2.7e-05	23480	4547	48.756	9.054
SLC46A3	6.57768	5.67e-08	3.04e-05	2359	374	8.722	1.326
TMEM156	8.12486	7.71e-08	3.87e-05	1168	150	7.093	0.873
NNMT	-6.1288	9.87e-08	4.87e-05	299	1911	4.907	30.074
RARRES1	-5.40034	1.13e-07	5.55e-05	590	3323	3.552	19.182
CAV1	5.57958	1.28e-07	6.21e-05	4590	858	19.947	3.575
LYPD6B	-12.8577	1.33e-07	6.4e-05	38	510	0.26	3.343
SLC22A3	191.156	1.74e-07	8.24e-05	187	1	0.391	0.002
TLE4	-11.7404	2.23e-07	0.000102583	43	525	0.104	1.221
UBL3	5.15298	2.24e-07	0.000102698	7490	1516	20.076	3.896
SUPT20H	5.34692	2.47e-07	0.000112343	4543	886	40.658	7.604
BCAS1	-5.08571	2.88e-07	0.000127387	610	3235	2.17	11.036
PKIB	5.33057	2.94e-07	0.000129529	4212	824	26.397	4.952
RP11-572P18.1	5.88284	2.98e-07	0.000130944	2279	404	49.41	8.399
CDK8	4.92464	3.51e-07	0.000151104	10007	2119	38.491	7.816
CDX2	7.49628	3.57e-07	0.000152739	1042	145	3.021	0.403
RPL21P75	5.73424	3.59e-07	0.000153014	2414	439	50.295	8.771
GABBR2	-10.6979	4.58e-07	0.000189758	47	525	0.096	1.027
RNF6	4.66852	5.12e-07	0.000209094	25947	5796	89.729	19.22
TGFBR3	-5.33585	5.29e-07	0.000212596	361	2008	0.661	3.527
SLC26A9	-8.66489	5.81e-07	0.000231799	72	652	0.188	1.629
CDH2	5.3452	6.12e-07	0.000241297	2866	559	9.012	1.686
MUC4	-4.2715	6.24e-07	0.000244944	4152	18494	3.035	12.964
SLC1A1	5.10349	7.18e-07	0.000275267	3655	747	11.539	2.261
TFF2	-4.28247	7.75e-07	0.000288423	2513	11223	53.496	229.095
CP	-6.11597	8.14e-07	0.000296985	182	1160	0.457	2.795
LNX2	4.69168	9.85e-07	0.000354351	7211	1603	18.321	3.905
TCP11L2	-5.82153	1.16e-06	0.000406224	200	1214	1.059	6.165
SLC16A5	-5.37529	1.18e-06	0.000411602	274	1536	1.748	9.396
PRKCQ	-16.5	1.21e-06	0.000420397	19	327	0.068	1.122
POLR1D	4.7368	1.22e-06	0.000421339	5237	1153	37.847	7.99
C4BPB	5.14407	1.28e-06	0.000441085	2624	532	31.528	6.129
KLHL5	4.39478	1.3e-06	0.000447881	28252	6704	100.601	22.891
RP11-50D9.1	5.93124	1.54e-06	0.00051041	1365	240	33.209	5.599
RPL21P119	5.98931	1.56e-06	0.000513445	1321	230	28.587	4.773
PIGR	-3.93878	1.65e-06	0.000540094	20094	82537	55.181	217.346
RALGPS1	-6.42038	1.97e-06	0.000630479	130	869	0.314	2.016
FABP4	-11.6602	1.98e-06	0.000631966	33	401	0.618	7.206
PLAT	-3.96554	2e-06	0.000635599	4395	18176	14.918	59.158
RP11-91K9.1	-27.75	2.12e-06	0.000670653	8	233	0.032	0.888
MGAT4A	4.45447	2.22e-06	0.000697699	6881	1611	40.068	8.995
GABRP	-15.9104	2.27e-06	0.000709404	19	313	0.067	1.066
CEACAM5	-4.03946	2.32e-06	0.000722134	1977	8328	9.478	38.286
TFF3	4.82131	2.36e-06	0.000733669	2959	640	31.353	6.503
SLC1A3	-4.19057	2.5e-06	0.000768744	1055	4611	3.395	14.227
RN7SL3	4.15826	2.51e-06	0.000770911	193062	48418	7638.48	1836.94
CEACAM6	-3.87936	2.54e-06	0.000774813	6087	24625	26.491	102.768
TRIB2	-4.20591	2.57e-06	0.000780259	992	4351	4.196	17.648
MSLN	12.0645	2.66e-06	0.000792147	404	35	2.244	0.186
OLFM1	-11.7397	2.94e-06	0.000862915	31	379	0.146	1.714
XYLT1	-11.359	3.07e-06	0.000893301	33	389	0.039	0.443
PHACTR3	4.24979	3.09e-06	0.000895532	11378	2792	84.354	19.849
RNASE1	-3.9211	3.6e-06	0.00102772	2032	8309	31.05	121.75
RP11-385J1.2	128	4.14e-06	0.00114136	128	0	1.782	0
RHOBTB3	4.19368	4.26e-06	0.00117113	9254	2301	19.639	4.683
IL18R1	-4.82637	4.27e-06	0.00117157	306	1540	0.933	4.503
TSC22D1	-3.97632	4.28e-06	0.00117328	1320	5474	8.869	35.266
ZMAT1	-12.0877	4.33e-06	0.00118457	28	352	0.057	0.689
VWA5A	-4.99771	4.71e-06	0.001281	254	1324	0.873	4.363
N4BP2L1	9.25693	4.73e-06	0.00128452	488	55	5.008	0.541
DZIP1	-9.72897	5.22e-06	0.00139799	41	416	0.107	1.041
PRSS23	4.28258	5.45e-06	0.00145067	4997	1217	14.625	3.415
GJA1	16.403	6.38e-06	0.00167851	284	18	1.099	0.067
C3	-7.68707	6.46e-06	0.00169636	66	528	0.147	1.13
WASF3	4.76536	7.17e-06	0.00187897	1929	422	4.732	0.993
PAN3-AS1	6.59426	7.57e-06	0.00197106	740	117	6.436	0.976
USP12	3.92649	7.73e-06	0.00200038	21688	5760	56.671	14.433
MTIF3	4.07103	8.03e-06	0.00206223	6976	1787	76.682	18.836
CFB	-3.94652	8.08e-06	0.0020707	876	3605	5.516	21.769
HMGB1P5	3.89187	8.17e-06	0.002088	30035	8048	358.309	92.066
RP11-673C5.1	3.89306	8.54e-06	0.0021769	24127	6463	438.872	112.732
CFB	-3.80989	8.69e-06	0.00220891	1247	4954	3.782	14.409
LGR5	-5.45063	9.36e-06	0.00234746	155	881	0.395	2.153
NFAT5	-3.70071	9.66e-06	0.00240239	1753	6766	3.231	11.957
SULT1C2	-3.74088	9.94e-06	0.00246242	1422	5547	5.978	22.363
MUC5AC	-3.79147	1e-05	0.00246607	1169	4622	7.385	28
DOCK11	-4.59231	1e-05	0.00246607	295	1412	0.52	2.388
RARB	4.65475	1.02e-05	0.00250049	1879	421	7.159	1.538
PELI2	-3.83818	1.03e-05	0.00251397	985	3943	1.959	7.519
HMGB1	3.78781	1.07e-05	0.00257985	91204	25110	835.974	220.701
CLRN3	13.6444	1.11e-05	0.00264359	301	23	3.07	0.225
LRP1	-4.36934	1.11e-05	0.00264359	364	1658	0.287	1.254
ATP10B	-3.5817	1.26e-05	0.00291165	2400	8963	3.727	13.349
MMP7	-3.4285	1.54e-05	0.00350366	8144	29118	85.065	291.645
RP11-460N11.3	-17.2852	1.57e-05	0.00356816	13	234	0.27	4.667
RP11-203F10.6	5.34472	1.68e-05	0.00378723	984	192	23.939	4.479
ITM2B	-3.44617	1.71e-05	0.00385472	4102	14742	25.694	88.546
PAN3	4.0757	1.76e-05	0.0039482	3369	862	16.205	3.976
GPR158	5.9717	1.78e-05	0.00399409	750	131	1.266	0.212
MIPEP	3.85268	1.78e-05	0.00399926	6698	1813	32.794	8.512
DEFB1	-4.3501	1.8e-05	0.00402126	313	1420	7.695	33.474
CNTNAP2	4.1668	1.89e-05	0.0041923	2682	671	5.196	1.247
HSPH1	3.68879	2.02e-05	0.00443877	17732	5013	256.607	69.564
C1QTNF9B-AS1	11.6556	2.03e-05	0.00445267	313	28	4.569	0.392
ZNF32	-5.72539	2.06e-05	0.00448994	112	669	1.158	6.63
CEA	-4.25022	2.09e-05	0.00454027	333	1476	6.77	28.774
OBSCN	4.80303	2.14e-05	0.00462122	1267	275	1.902	0.396
ANKRD20A5P	-109	2.28e-05	0.00488691	0	109	0	0.36
LXN	-3.6999	2.53e-05	0.00535822	763	2944	8.034	29.725
STARD13	4.79879	2.74e-05	0.00575071	1174	255	2.385	0.497
CSAG1	70.4722	2.84e-05	0.00595735	136	2	2.537	0.036
KITLG	-3.26023	3.02e-05	0.00628558	11141	37879	25.22	82.223
HTR1B	-65.7333	3.07e-05	0.00636101	2	135	0.015	0.986
AXIN2	-6.1234	3.2e-05	0.0065811	85	544	0.235	1.439
CFTR	-3.34709	3.21e-05	0.00659552	2563	8946	6.978	23.356
KRT13	-4.38008	3.24e-05	0.00664661	250	1142	2.41	10.556
PDS5B	3.55581	3.28e-05	0.00671983	19816	5812	31.06	8.735
CTSV	-4.23657	3.42e-05	0.00695135	285	1259	3.183	13.485
CENPJ	3.5865	3.58e-05	0.00726027	10795	3139	30.123	8.399
MCAM	4.39501	3.69e-05	0.00740604	1471	349	5.463	1.243
LGALS1	3.62114	3.85e-05	0.00768896	7417	2136	287.642	79.434
HAS2	13.6471	4.47e-05	0.00879106	248	19	0.696	0.051
TRANK1	-3.796	4.83e-05	0.00939312	446	1765	0.5	1.898
MATN2	-3.87688	4.85e-05	0.00940868	392	1585	1.73	6.707
COL4A3	8.04286	4.93e-05	0.00953578	388	50	0.563	0.07
SGK1	-4.12625	4.95e-05	0.00956619	283	1218	1.798	7.419
PRICKLE2	-10.9394	5.05e-05	0.00968459	23	266	0.033	0.361
GATA3	-3.71701	5.32e-05	0.0100764	486	1884	2.152	7.999
AC124789.1	4.97398	5.37e-05	0.0101341	868	182	14.529	2.921
LGALS4	4.19513	5.38e-05	0.0101341	1553	386	11.889	2.834
CHN2	-3.83133	5.47e-05	0.0102645	399	1594	1.328	5.088
RP11-298P3.4	7.10532	5.76e-05	0.0106739	443	65	6.814	0.959
TNFRSF11B	3.62074	5.84e-05	0.0107842	4389	1264	21.471	5.93
STK38L	-3.46478	5.95e-05	0.0109176	791	2858	13.998	48.5
ANKRD10	-3.20053	6.07e-05	0.0111255	2502	8351	11.784	37.715
SLC7A11-AS1	6.33495	6.09e-05	0.0111437	517	85	1.305	0.206
GPR87	-5.17053	6.21e-05	0.0113044	118	636	0.862	4.457
SPNS2	-3.29659	6.29e-05	0.0114106	1349	4638	4.599	15.161
GRHL1	-3.61114	6.68e-05	0.0119861	528	1988	1.741	6.287
STAC	-97	6.89e-05	0.0123089	0	97	0	0.339
IL1R1	-4.80243	6.95e-05	0.0124072	144	721	0.329	1.58
CXCL5	-3.0728	7.11e-05	0.0126688	9289	29766	43.007	132.152
BMP4	-3.21319	7.13e-05	0.0126933	1776	5951	18.767	60.302
NIPAL4	-35.1429	7.43e-05	0.0131636	4	143	0.014	0.492
SERPINB2	5.34891	7.47e-05	0.0131953	672	131	3.664	0.685
AZGP1	-3.77047	7.63e-05	0.0134327	379	1490	3.407	12.846
SAT1	-3.10723	7.82e-05	0.0137036	3495	11325	38.562	119.821
NCKAP5	7.98571	7.87e-05	0.0137798	361	47	0.559	0.07
AHCYL2	-3.2733	8.03e-05	0.0139803	1162	3966	2.704	8.851
C9orf169	4.59989	8.17e-05	0.0141571	953	216	8.634	1.877
VIPR1	-3.49566	8.19e-05	0.0141748	598	2180	2.534	8.858
MED12L	-4.94891	8.25e-05	0.0142419	125	646	0.137	0.678
ESRRG	-95	8.31e-05	0.0143061	0	95	0	0.203
B3GALTL	3.43836	8.43e-05	0.0144465	6301	1911	17.405	5.062
MMP1	14.7791	8.58e-05	0.0146587	213	15	1.271	0.086
CD163L1	4.55849	9e-05	0.0152566	949	217	2.416	0.53
IL32	4.07655	9.03e-05	0.0152804	1423	364	26.84	6.584
RP11-321C1.1	-94	9.12e-05	0.0154037	0	94	0	0.221
IFT57	-3.20696	9.25e-05	0.0156116	1330	4448	20.7	66.384
AMOT	-7.49032	9.53e-05	0.0159306	44	343	0.155	1.161
FABP2	93	0.000100182	0.0166041	93	0	0.441	0
SCN8A	-4.72487	0.000104315	0.0171206	136	671	0.189	0.893
CA2	-4.72288	0.000106236	0.0173794	136	670	0.931	4.397
SLC40A1	-3.09998	0.000111294	0.0181433	1872	6052	6.391	19.812
CRNDE	-4.06096	0.000112746	0.0183453	230	974	4.101	16.654
MAGI1	-3.04522	0.000113285	0.0184133	2763	8775	4.379	13.335
ZBTB7C	-7.09821	0.000116193	0.0188252	47	349	0.112	0.795
CAV2	3.36772	0.000116505	0.0188455	5768	1786	20.533	6.097
USPL1	3.39807	0.000117695	0.0189068	4907	1506	15.118	4.449
RP11-689K5.3	26.375	0.000117906	0.0189206	152	6	3.587	0.136
DHRS2	-4.68382	0.00011854	0.0189622	136	664	0.952	4.459
CPVL	-3.44883	0.000119699	0.019027	533	1917	11.862	40.91
VNN1	-3.30262	0.000122344	0.0192855	746	2569	2.822	9.32
NR1H4	-7.75089	0.000123847	0.0195021	39	315	0.281	2.178
KIRREL	3.67065	0.000124798	0.0195908	2157	613	3.689	1.005
MORC4	-3.02539	0.000127489	0.0199718	2591	8175	8.548	25.861
KIAA1324L	3.741	0.000129135	0.0201672	1875	523	3.221	0.861
BEX2	-4.09781	0.000135557	0.0209755	209	893	2.28	9.343
FARP1	-3.15521	0.000136813	0.0211483	1107	3643	1.585	5.001
SPOCK1	-7.83333	0.000141973	0.0218545	37	303	0.09	0.705
GPR110	-2.9236	0.000148318	0.0225356	6447	19657	8.298	24.26
CCDC169	5.26826	0.000151957	0.0229207	581	115	4.183	0.794
ALOX5	-3.18927	0.000152997	0.0230157	886	2947	4.158	13.261
RP11-311C24.1	-3.85903	0.000156018	0.0232908	256	1030	1.894	7.309
NR3C2	5.67816	0.000161888	0.0239256	497	91	0.988	0.174
CREB3L1	-4.82669	0.000163749	0.02413	114	574	0.502	2.423
PDZK1	6.50289	0.000176783	0.0257008	399	64	2.25	0.346
SOGA2	4.2397	0.000186556	0.0268792	935	230	18.943	4.468
NEAT1	-2.9001	0.000188483	0.0270383	3874	11718	2.002	5.806
CCBE1	20.7544	0.000189584	0.0271707	158	8	1.183	0.057
ALDH1A1	-2.91785	0.000192915	0.0275437	2962	9013	39.597	115.538
BCL6	-3.70701	0.000200889	0.0284513	279	1079	0.785	2.91
PROS1	-3.44907	0.000202183	0.0285708	407	1464	1.345	4.639
TINAG	12.6606	0.000204054	0.0287814	206	17	1.38	0.109
SYTL5	3.46267	0.000208814	0.0292892	2358	710	5.89	1.701
RPL21P28	4.117	0.000209916	0.0293894	987	250	21.359	5.188
SPATA6	-13.0606	0.000213147	0.0297593	14	190	0.033	0.431
HMGB1P10	3.42641	0.00021922	0.030411	2484	756	51.845	15.131
MPP1	22.2895	0.00022269	0.0308076	149	7	0.847	0.038
SLC7A1	3.13141	0.000224905	0.031	9282	3091	14.846	4.741
APCDD1	-31.0556	0.00023216	0.031856	4	127	0.018	0.559
SYNE2	-2.78958	0.000232702	0.0319014	31384	91302	17.983	50.165
GCNT3	-3.24542	0.000241578	0.0328212	554	1875	12.994	42.171
ADRA2A	-18.7083	0.000242241	0.0328524	8	154	0.024	0.449
ULK4	-3.18293	0.000243253	0.0329602	644	2137	1.64	5.22
AHNAK2	3.27445	0.000250534	0.0335862	3484	1110	2.243	0.685
SNORD3D	-2.81685	0.000260068	0.0346802	4676	13736	254.383	716.559
ACER2	-3.22893	0.000260577	0.0347174	549	1849	2.883	9.309
RDX	3.09527	0.00026523	0.0350905	8836	2977	202.793	65.517
PHLDB2	3.21731	0.000282282	0.0370553	3798	1231	7.284	2.264
RP11-363E7.4	-3.10724	0.000283311	0.0371347	711	2304	4.252	13.212
FAM126A	3.30379	0.000283538	0.0371347	2810	887	10.549	3.193
TRPV6	8.05128	0.000295069	0.0381389	279	36	0.314	0.039
HEG1	-3.99119	0.000315644	0.0401812	177	736	0.227	0.906
CAPN5	-3.24038	0.000332111	0.0419601	467	1578	1.248	4.044
C10orf11	-5.19804	0.000337932	0.0425536	78	423	1.02	5.302
DNAH12	4.64762	0.000344397	0.0431283	606	136	2.928	0.63
TM4SF4	3.83573	0.000347928	0.0434511	1048	285	5.861	1.528
GUCY1B2	-5.74157	0.000371496	0.0459399	60	359	0.356	2.044
MMP10	14.6753	0.000375991	0.04642	169	12	1.13	0.077
ELL3	4.06201	0.000388585	0.0478013	826	212	4.127	1.016
NDRG2	-3.79261	0.00040529	0.0494729	197	779	1.543	5.852
CFI	-3.04228	0.000411608	0.0501275	655	2078	4.021	12.233
CTSH	-2.71316	0.000414462	0.0503245	4836	13683	82.238	223.125
AMOTL1	3.02238	0.000414472	0.0503245	6301	2174	8.372	2.77
PALM2	4.16667	0.000414592	0.0503245	751	188	0.95	0.228
CCDC169-SOHLH2	5.10507	0.00042151	0.051015	475	97	2.721	0.533
SOHLH2	5.10507	0.00042151	0.051015	475	97	2.721	0.533
ADAM22	3.55792	0.00043165	0.0519785	1310	384	5.529	1.554
PRKCA	-2.87369	0.00043516	0.052318	1138	3410	1.528	4.391
CLDN2	-4.25049	0.000453549	0.0540569	128	567	0.515	2.189
PAQR5	3.38513	0.000458493	0.0545174	1656	510	3.551	1.049
FGF20	-77	0.00045999	0.054567	0	77	0	0.514
SNORD3B-2	-2.68477	0.000465052	0.0550381	5160	14447	280.713	753.649
EFEMP1	5.45918	0.000473233	0.0557451	413	79	1.605	0.294
ANKS4B	4.58384	0.000480587	0.0565234	567	129	2.269	0.495
RP11-296A16.1	3.94223	0.000507177	0.0588286	824	218	4.163	1.056
FAM102A	-3.33407	0.000512232	0.0592788	320	1112	0.907	3.024
NTRK2	-5.61458	0.000532258	0.0608986	58	340	0.096	0.539
TRAK1	-2.69933	0.000537406	0.0613948	2684	7555	6.266	16.914
GRIP1	-4.33333	0.000539294	0.0615177	115	519	0.276	1.196
ADAMTS14	-12.8148	0.000552191	0.0626586	12	162	0.027	0.346
C12orf75	2.91978	0.000569918	0.0638014	7635	2727	101.147	34.642
GBP2	-2.71384	0.000569198	0.0638014	2073	5867	10.973	29.779
STARD4	3.14297	0.000592804	0.0654053	2390	793	8.024	2.553
C11orf93	-3.88494	0.000590968	0.0654053	159	644	1.321	5.132
CTD-3099C6.9	24.95	0.000590339	0.0654053	121	5	0.499	0.02
MIR146A	-3.4532	0.000603978	0.0664446	251	904	1.282	4.427
FSTL1	-3.01883	0.00060468	0.0664736	537	1691	1.062	3.206
DGKH	-2.85852	0.000607667	0.0667534	871	2596	2.382	6.809
MDFIC	-2.68402	0.000612691	0.0671107	2338	6544	5.975	16.037
RP1-27K12.4	74	0.000615182	0.0671408	74	0	1.59	0
DTNA	-74	0.000615182	0.0671408	0	74	0	0.135
SLC27A5	4.47059	0.000615938	0.067175	557	130	3.268	0.731
ZNF826P	7.02878	0.000616734	0.0672133	277	41	0.977	0.139
CEACAM1	-3.39087	0.000628084	0.0681377	269	951	0.898	3.045
ZNF883	-5.97942	0.000666639	0.0714696	48	299	0.243	1.453
SPATA13	2.86109	0.00067232	0.0717464	9244	3369	12.626	4.413
CCAT1	-2.91313	0.0006736	0.0717464	666	2023	3.672	10.697
CTD-2354A18.1	-8.08397	0.000673947	0.0717464	26	219	0.262	2.118
EIF4E3	-3.26524	0.000673957	0.0717464	314	1069	0.607	1.982
SOX6	12.4091	0.000673767	0.0717464	168	14	0.273	0.022
ANO3	73	0.000678018	0.0719763	73	0	0.275	0
SETBP1	-73	0.000678018	0.0719763	0	73	0	0.083
IQGAP2	-2.59461	0.00068567	0.0725852	5958	16121	20.738	53.807
LIPC	-2.7741	0.000688972	0.072833	1093	3162	15.759	43.717
CHP2	-19.7	0.000697098	0.073538	6	125	0.03	0.591
PRLR	-3.34397	0.000700621	0.0737555	276	961	0.282	0.943
ACSL5	-2.57893	0.00070222	0.0738725	7938	21349	28.43	73.319
DYNLT3	3.15695	0.00071049	0.0745355	1995	659	32.605	10.328
GPR27	-5.25743	0.000720316	0.0752018	63	346	0.303	1.593
LRRC6	-3.70129	0.000724131	0.0754831	177	683	1.242	4.597
SLC9A2	-2.72585	0.000724506	0.0754831	1320	3752	2.867	7.815
CAB39L	-3.1401	0.000735272	0.0765522	373	1221	1.192	3.743
UGT1A13P	-4.10807	0.00074046	0.0769337	123	527	1.897	7.793
NOVA1	-72	0.000747403	0.0773758	0	72	0	0.123
ABCA6	-5.35338	0.000748553	0.0774029	60	335	0.133	0.712
ATP8B5P	7.78571	0.000754911	0.0778478	239	32	0.981	0.126
PALM2-AKAP2	4.98248	0.000757849	0.0780977	425	89	3.697	0.742
ME1	2.94643	0.000761812	0.0783994	3834	1357	13.365	4.536
UGT2B15	24.5185	0.000777641	0.079542	117	5	0.662	0.027
SYCP2	3.10283	0.000781709	0.0798239	2130	716	4.496	1.449
NRP2	-2.85144	0.000797997	0.0811857	708	2105	1.252	3.57
IRAK3	-2.66022	0.000806601	0.0818293	1714	4755	2.325	6.185
PPFIBP2	-3.25703	0.00082366	0.083109	290	985	6.334	20.63
BST1	-10.4043	0.000831746	0.0837195	16	173	0.094	0.978
SLC7A7	3.36677	0.000844758	0.0848038	1214	376	12.319	3.659
ELK3	-2.82055	0.000874112	0.0871156	728	2141	2.034	5.737
IRS2	-2.87625	0.000908214	0.0899104	597	1790	1.002	2.882
FRY	3.54744	0.000920826	0.0909336	932	274	15.403	4.342
DOCK3	-3.95349	0.000961946	0.094318	128	528	0.172	0.68
TNS1	-12.3077	0.000965308	0.0945864	11	147	0.013	0.16
TLR4	-2.64784	0.000989986	0.0965813	1372	3788	3.328	8.812
CBLB	-3.41734	0.00102467	0.0995035	213	759	0.369	1.261
AC156455.1	8.55287	0.00103605	0.100414	205	25	2.831	0.331
FAM26F	5.0411	0.00103911	0.100582	382	79	4.048	0.803
MLPH	-2.75696	0.00107583	0.103344	760	2185	10.348	28.529
AQP3	-3.22067	0.00108445	0.103974	271	910	1.722	5.546
EPS8L1	-2.88066	0.00110298	0.10555	515	1547	2.564	7.386
ANTXR2	2.73882	0.00114746	0.109323	8498	3236	12.07	4.407
RP11-53O19.1	-16.824	0.00116464	0.110405	7	123	0.125	2.103
RASL11A	5.31084	0.0011781	0.111471	341	67	2.597	0.489
DENND2C	4.08527	0.00119144	0.112453	553	141	1.054	0.258
TTLL6	3.68113	0.00119949	0.112931	737	209	1.951	0.53
MMP28	-3.45345	0.00121259	0.113811	191	688	0.913	3.153
TMC5	-2.47339	0.0012281	0.11491	5557	14334	13.733	33.967
HLA-DMA	-7.00493	0.00124505	0.116353	30	219	0.203	1.422
FERMT2	2.98844	0.00124695	0.116387	1983	692	6.981	2.336
SCARB1	3.2254	0.00124992	0.116592	1218	394	2.59	0.803
FAM43A	-6.05333	0.00126872	0.117694	40	253	0.15	0.908
SFTA2	3.42857	0.0012834	0.118765	914	278	17.184	5.012
CYP2S1	-3.13119	0.00129097	0.119249	287	937	1.212	3.795
ASS1	-2.52137	0.00129668	0.119628	2280	5995	49.159	123.948
ZNF365	-3.03256	0.00129907	0.119702	338	1069	0.952	2.887
CTD-2535L24.2	-6.27138	0.00131067	0.120551	37	242	0.269	1.687
FAM101A	9.15455	0.00132474	0.121698	184	21	1.007	0.11
SPINK5	-2.45974	0.00134051	0.123072	4985	12787	21.906	53.883
FABP6	-3.30636	0.00135097	0.123807	219	755	3.881	12.832
FLNA	2.65675	0.00136233	0.124697	17755	6969	25.194	9.483
STX2	2.84288	0.00138289	0.126198	2939	1078	10.368	3.647
SCARNA7	-2.46411	0.00141608	0.128684	3695	9495	131.573	324.21
SERPINE2	3.33848	0.00146788	0.132202	954	298	5.188	1.554
KLHL3	-2.93805	0.0014769	0.132777	379	1161	0.678	1.992
ENAM	8.5	0.00149329	0.134012	189	23	0.391	0.046
SYT13	5.61667	0.00154241	0.137605	295	55	0.674	0.12
ARHGAP29	2.67487	0.00156297	0.139003	7451	2905	10.325	3.86
IER5L	-2.70148	0.00161151	0.142678	655	1845	2.844	7.683
C11orf92	-2.9335	0.00161789	0.143075	362	1108	0.782	2.294
PDE5A	2.8262	0.00165803	0.146028	2574	950	4.228	1.496
PQLC3	-3.29974	0.00167888	0.147692	202	695	2.302	7.596
CEBPD	-2.86779	0.00168071	0.14772	408	1220	2.201	6.312
ALPPL2	-2.81566	0.00168933	0.148315	458	1345	2.159	6.079
PADI2	6.90909	0.00169057	0.148315	225	34	0.608	0.088
DEF6	-2.99938	0.00169587	0.148646	313	979	1.626	4.877
AGR3	-2.39835	0.00171286	0.149899	6300	15757	98.838	237.048
